# Supplementary material for: Analysis of uncertainty of neural fingerprint-based models
Source: Royal Society of Chemistry journal article supplement (doi:10.1039/d4fd00095a), 2024-09-25
Supplement: d4fd00095a1.pdf [file d4fd00095a1.pdf]

Supplementary Information:  
Analysis of Uncertainty of Neural  
Fingerprint-based Models

Christian W. Feldmann<sup>1,+</sup>, Jochen Sieg<sup>1,+</sup>, and Miriam Mathea<sup>1,+,\*</sup>

<sup>1</sup>BASF SE, Ludwigshafen, Germany

\*miriam.mathea@basf.com

<sup>+</sup>these authors contributed equally to this work

Mai 2024

Table S1. Performance of all endpoints. The Brier score and balanced accuracy of all endpoints for Chemprop, Morgan FP + RF, and Neural FP + RF are shown using the random split. Morgan FP corresponds to Morgan count fingerprints.

| endpoint                       | model          | Balanced accuracy | Brier score |
|--------------------------------|----------------|-------------------|-------------|
| APR_HepG2_CellLoss_72h_dn      | Chemprop       | 0.70 ± 0.02       | 0.22 ± 0.02 |
| APR_HepG2_CellLoss_72h_dn      | Morgan FP + RF | 0.68 ± 0.04       | 0.20 ± 0.02 |
| APR_HepG2_CellLoss_72h_dn      | Neural FP + RF | 0.71 ± 0.03       | 0.19 ± 0.01 |
| ATG_NRF2_ARE_CIS_up            | Chemprop       | 0.73 ± 0.01       | 0.19 ± 0.01 |
| ATG_NRF2_ARE_CIS_up            | Morgan FP + RF | 0.70 ± 0.01       | 0.18 ± 0.00 |
| ATG_NRF2_ARE_CIS_up            | Neural FP + RF | 0.71 ± 0.01       | 0.18 ± 0.00 |
| ATG_PXRE_CIS_up                | Chemprop       | 0.74 ± 0.01       | 0.19 ± 0.01 |
| ATG_PXRE_CIS_up                | Morgan FP + RF | 0.73 ± 0.01       | 0.19 ± 0.01 |
| ATG_PXRE_CIS_up                | Neural FP + RF | 0.74 ± 0.01       | 0.18 ± 0.00 |
| BSK_3C_HLADR_down              | Chemprop       | 0.69 ± 0.04       | 0.21 ± 0.02 |
| BSK_3C_HLADR_down              | Morgan FP + RF | 0.65 ± 0.03       | 0.19 ± 0.01 |
| BSK_3C_HLADR_down              | Neural FP + RF | 0.67 ± 0.03       | 0.19 ± 0.01 |
| BSK_3C_Proliferation_down      | Chemprop       | 0.70 ± 0.01       | 0.21 ± 0.01 |
| BSK_3C_Proliferation_down      | Morgan FP + RF | 0.68 ± 0.02       | 0.19 ± 0.01 |
| BSK_3C_Proliferation_down      | Neural FP + RF | 0.72 ± 0.03       | 0.19 ± 0.01 |
| BSK_3C_SRB_down                | Chemprop       | 0.68 ± 0.02       | 0.20 ± 0.02 |
| BSK_3C_SRB_down                | Morgan FP + RF | 0.61 ± 0.02       | 0.18 ± 0.01 |
| BSK_3C_SRB_down                | Neural FP + RF | 0.66 ± 0.04       | 0.18 ± 0.01 |
| BSK_3C_Vis_down                | Chemprop       | 0.66 ± 0.03       | 0.19 ± 0.02 |
| BSK_3C_Vis_down                | Morgan FP + RF | 0.60 ± 0.03       | 0.18 ± 0.01 |
| BSK_3C_Vis_down                | Neural FP + RF | 0.63 ± 0.03       | 0.17 ± 0.01 |
| BSK_4H_Eotaxin3_down           | Chemprop       | 0.64 ± 0.04       | 0.20 ± 0.01 |
| BSK_4H_Eotaxin3_down           | Morgan FP + RF | 0.56 ± 0.02       | 0.19 ± 0.01 |
| BSK_4H_Eotaxin3_down           | Neural FP + RF | 0.62 ± 0.03       | 0.18 ± 0.00 |
| BSK_CAS3M3C_Proliferation_down | Chemprop       | 0.65 ± 0.02       | 0.21 ± 0.01 |
| BSK_CAS3M3C_Proliferation_down | Morgan FP + RF | 0.58 ± 0.02       | 0.18 ± 0.01 |
| BSK_CAS3M3C_Proliferation_down | Neural FP + RF | 0.61 ± 0.01       | 0.18 ± 0.00 |
| BSK_LPS_VCAM1_down             | Chemprop       | 0.68 ± 0.02       | 0.19 ± 0.01 |
| BSK_LPS_VCAM1_down             | Morgan FP + RF | 0.61 ± 0.02       | 0.17 ± 0.00 |
| BSK_LPS_VCAM1_down             | Neural FP + RF | 0.63 ± 0.01       | 0.17 ± 0.00 |
| BSK_SAg_CD38_down              | Chemprop       | 0.68 ± 0.03       | 0.19 ± 0.02 |
| BSK_SAg_CD38_down              | Morgan FP + RF | 0.60 ± 0.03       | 0.18 ± 0.01 |
| BSK_SAg_CD38_down              | Neural FP + RF | 0.64 ± 0.02       | 0.17 ± 0.01 |
| BSK_SAg_CD40_down              | Chemprop       | 0.67 ± 0.04       | 0.19 ± 0.02 |
| BSK_SAg_CD40_down              | Morgan FP + RF | 0.60 ± 0.02       | 0.18 ± 0.01 |
| BSK_SAg_CD40_down              | Neural FP + RF | 0.63 ± 0.03       | 0.17 ± 0.01 |
| BSK_SAg_Proliferation_down     | Chemprop       | 0.69 ± 0.01       | 0.21 ± 0.01 |
| BSK_SAg_Proliferation_down     | Morgan FP + RF | 0.65 ± 0.02       | 0.19 ± 0.01 |
| BSK_SAg_Proliferation_down     | Neural FP + RF | 0.67 ± 0.04       | 0.19 ± 0.02 |
| BSK_hDFCGF_CollagenIII_down    | Chemprop       | 0.72 ± 0.01       | 0.18 ± 0.01 |
| BSK_hDFCGF_CollagenIII_down    | Morgan FP + RF | 0.59 ± 0.01       | 0.17 ± 0.01 |
| BSK_hDFCGF_CollagenIII_down    | Neural FP + RF | 0.63 ± 0.03       | 0.17 ± 0.01 |
| BSK_hDFCGF_Proliferation_down  | Chemprop       | 0.70 ± 0.02       | 0.22 ± 0.02 |
| BSK_hDFCGF_Proliferation_down  | Morgan FP + RF | 0.67 ± 0.03       | 0.20 ± 0.01 |
| BSK_hDFCGF_Proliferation_down  | Neural FP + RF | 0.69 ± 0.02       | 0.20 ± 0.00 |
| CEETOX_H295R_11DCORT_dn        | Chemprop       | 0.58 ± 0.02       | 0.23 ± 0.01 |
| CEETOX_H295R_11DCORT_dn        | Morgan FP + RF | 0.58 ± 0.02       | 0.22 ± 0.01 |
| CEETOX_H295R_11DCORT_dn        | Neural FP + RF | 0.64 ± 0.05       | 0.21 ± 0.01 |
| CEETOX_H295R_ANDR_dn           | Chemprop       | 0.60 ± 0.05       | 0.25 ± 0.03 |
| CEETOX_H295R_ANDR_dn           | Morgan FP + RF | 0.58 ± 0.03       | 0.22 ± 0.02 |
| CEETOX_H295R_ANDR_dn           | Neural FP + RF | 0.62 ± 0.07       | 0.21 ± 0.03 |
| TOX21_ARE_BLA_agonist_ratio    | Chemprop       | 0.67 ± 0.01       | 0.15 ± 0.01 |
| TOX21_ARE_BLA_agonist_ratio    | Morgan FP + RF | 0.59 ± 0.01       | 0.14 ± 0.00 |
| TOX21_ARE_BLA_agonist_ratio    | Neural FP + RF | 0.60 ± 0.01       | 0.14 ± 0.00 |
| TOX21_TR_LUC_GH3_Antagonist    | Chemprop       | 0.75 ± 0.01       | 0.12 ± 0.00 |
| TOX21_TR_LUC_GH3_Antagonist    | Morgan FP + RF | 0.67 ± 0.01       | 0.11 ± 0.00 |
| TOX21_TR_LUC_GH3_Antagonist    | Neural FP + RF | 0.69 ± 0.01       | 0.11 ± 0.00 |

Table S2. Comparison of calibrated and uncalibrated RF models using the neural fingerprint. Shown are the balanced accuracy, Brier score, and log loss of the models on the 19 ToxCast endpoint data sets over a **cluster** split.

| endpoint                      | metric      | Neural FP     |             |
|-------------------------------|-------------|---------------|-------------|
|                               |             | Calibrated RF | RF          |
| APR_HepG2_CellLoss_72h_dn     | BA          | 0.69 ± 0.06   | 0.69 ± 0.06 |
| APR_HepG2_CellLoss_72h_dn     | Brier score | 0.20 ± 0.01   | 0.20 ± 0.02 |
| APR_HepG2_CellLoss_72h_dn     | Log loss    | 0.59 ± 0.03   | 0.57 ± 0.04 |
| ATG_NRF2_ARE_CIS_up           | BA          | 0.68 ± 0.02   | 0.69 ± 0.02 |
| ATG_NRF2_ARE_CIS_up           | Brier score | 0.19 ± 0.01   | 0.19 ± 0.02 |
| ATG_NRF2_ARE_CIS_up           | Log loss    | 0.56 ± 0.03   | 0.56 ± 0.04 |
| ATG_PXRE_CIS_up               | BA          | 0.71 ± 0.02   | 0.71 ± 0.03 |
| ATG_PXRE_CIS_up               | Brier score | 0.19 ± 0.01   | 0.19 ± 0.01 |
| ATG_PXRE_CIS_up               | Log loss    | 0.58 ± 0.02   | 0.57 ± 0.02 |
| BSK_3C_HLADR_down             | BA          | 0.65 ± 0.03   | 0.63 ± 0.03 |
| BSK_3C_HLADR_down             | Brier score | 0.21 ± 0.01   | 0.21 ± 0.01 |
| BSK_3C_HLADR_down             | Log loss    | 0.60 ± 0.02   | 0.60 ± 0.02 |
| BSK_3C_Proliferation_down     | BA          | 0.64 ± 0.02   | 0.64 ± 0.02 |
| BSK_3C_Proliferation_down     | Brier score | 0.21 ± 0.01   | 0.21 ± 0.01 |
| BSK_3C_Proliferation_down     | Log loss    | 0.61 ± 0.03   | 0.61 ± 0.03 |
| BSK_3C_SRB_down               | BA          | 0.61 ± 0.05   | 0.63 ± 0.05 |
| BSK_3C_SRB_down               | Brier score | 0.19 ± 0.02   | 0.19 ± 0.02 |
| BSK_3C_SRB_down               | Log loss    | 0.56 ± 0.04   | 0.55 ± 0.04 |
| BSK_3C_Vis_down               | BA          | 0.57 ± 0.02   | 0.59 ± 0.04 |
| BSK_3C_Vis_down               | Brier score | 0.18 ± 0.01   | 0.18 ± 0.01 |
| BSK_3C_Vis_down               | Log loss    | 0.54 ± 0.03   | 0.54 ± 0.03 |
| BSK_4H_Eotaxin3_down          | BA          | 0.56 ± 0.03   | 0.57 ± 0.03 |
| BSK_4H_Eotaxin3_down          | Brier score | 0.19 ± 0.01   | 0.19 ± 0.01 |
| BSK_4H_Eotaxin3_down          | Log loss    | 0.56 ± 0.01   | 0.55 ± 0.02 |
| BSK_CASM3C_Proliferation_down | BA          | 0.54 ± 0.02   | 0.58 ± 0.02 |
| BSK_CASM3C_Proliferation_down | Brier score | 0.20 ± 0.02   | 0.20 ± 0.02 |
| BSK_CASM3C_Proliferation_down | Log loss    | 0.58 ± 0.04   | 0.58 ± 0.04 |
| BSK_LPS_VCAM1_down            | BA          | 0.55 ± 0.02   | 0.55 ± 0.02 |
| BSK_LPS_VCAM1_down            | Brier score | 0.19 ± 0.01   | 0.19 ± 0.01 |
| BSK_LPS_VCAM1_down            | Log loss    | 0.56 ± 0.02   | 0.55 ± 0.02 |
| BSK_SAg_CD38_down             | BA          | 0.58 ± 0.03   | 0.59 ± 0.04 |
| BSK_SAg_CD38_down             | Brier score | 0.19 ± 0.00   | 0.19 ± 0.00 |
| BSK_SAg_CD38_down             | Log loss    | 0.55 ± 0.01   | 0.56 ± 0.02 |
| BSK_SAg_CD40_down             | BA          | 0.56 ± 0.04   | 0.58 ± 0.04 |
| BSK_SAg_CD40_down             | Brier score | 0.19 ± 0.01   | 0.19 ± 0.01 |
| BSK_SAg_CD40_down             | Log loss    | 0.56 ± 0.03   | 0.55 ± 0.02 |
| BSK_SAg_Proliferation_down    | BA          | 0.60 ± 0.03   | 0.63 ± 0.02 |
| BSK_SAg_Proliferation_down    | Brier score | 0.21 ± 0.01   | 0.21 ± 0.01 |
| BSK_SAg_Proliferation_down    | Log loss    | 0.61 ± 0.02   | 0.60 ± 0.01 |
| BSK_hDFCGF_CollagenIII_down   | BA          | 0.54 ± 0.02   | 0.59 ± 0.02 |
| BSK_hDFCGF_CollagenIII_down   | Brier score | 0.19 ± 0.02   | 0.19 ± 0.02 |
| BSK_hDFCGF_CollagenIII_down   | Log loss    | 0.56 ± 0.04   | 0.55 ± 0.04 |
| BSK_hDFCGF_Proliferation_down | BA          | 0.65 ± 0.03   | 0.68 ± 0.04 |
| BSK_hDFCGF_Proliferation_down | Brier score | 0.21 ± 0.01   | 0.21 ± 0.02 |
| BSK_hDFCGF_Proliferation_down | Log loss    | 0.61 ± 0.03   | 0.60 ± 0.04 |
| CEETOX_H295R_11DCORT_dn       | BA          | 0.57 ± 0.02   | 0.59 ± 0.02 |
| CEETOX_H295R_11DCORT_dn       | Brier score | 0.22 ± 0.02   | 0.22 ± 0.02 |
| CEETOX_H295R_11DCORT_dn       | Log loss    | 0.63 ± 0.04   | 0.64 ± 0.06 |
| CEETOX_H295R_ANDR_dn          | BA          | 0.54 ± 0.04   | 0.61 ± 0.03 |
| CEETOX_H295R_ANDR_dn          | Brier score | 0.22 ± 0.01   | 0.22 ± 0.01 |
| CEETOX_H295R_ANDR_dn          | Log loss    | 0.63 ± 0.03   | 0.62 ± 0.02 |
| TOX21_ARE_BLA_agonist_ratio   | BA          | 0.50 ± 0.00   | 0.57 ± 0.01 |
| TOX21_ARE_BLA_agonist_ratio   | Brier score | 0.16 ± 0.02   | 0.15 ± 0.01 |
| TOX21_ARE_BLA_agonist_ratio   | Log loss    | 0.48 ± 0.04   | 0.46 ± 0.03 |
| TOX21_TR_LUC_GH3_Antagonist   | BA          | 0.63 ± 0.03   | 0.62 ± 0.03 |
| TOX21_TR_LUC_GH3_Antagonist   | Brier score | 0.13 ± 0.01   | 0.13 ± 0.01 |
| TOX21_TR_LUC_GH3_Antagonist   | Log loss    | 0.41 ± 0.03   | 0.41 ± 0.02 |

Table S3. Comparison of calibrated and uncalibrated RF models using the neural fingerprint. The balanced accuracy, Brier score, and log loss of the models on the 19 ToxCast endpoint data sets over a **random** split are shown.

| endpoint                      | metric      | Neural FP     |             |
|-------------------------------|-------------|---------------|-------------|
|                               |             | Calibrated RF | RF          |
| APR_HepG2_CellLoss_72h_dn     | BA          | 0.71 ± 0.03   | 0.71 ± 0.03 |
| APR_HepG2_CellLoss_72h_dn     | Brier score | 0.19 ± 0.01   | 0.19 ± 0.01 |
| APR_HepG2_CellLoss_72h_dn     | Log loss    | 0.57 ± 0.03   | 0.56 ± 0.03 |
| ATG_NRF2_ARE_CIS_up           | BA          | 0.71 ± 0.01   | 0.71 ± 0.01 |
| ATG_NRF2_ARE_CIS_up           | Brier score | 0.18 ± 0.00   | 0.18 ± 0.00 |
| ATG_NRF2_ARE_CIS_up           | Log loss    | 0.53 ± 0.01   | 0.53 ± 0.01 |
| ATG_PXRE_CIS_up               | BA          | 0.74 ± 0.01   | 0.74 ± 0.01 |
| ATG_PXRE_CIS_up               | Brier score | 0.18 ± 0.00   | 0.18 ± 0.00 |
| ATG_PXRE_CIS_up               | Log loss    | 0.55 ± 0.01   | 0.54 ± 0.01 |
| BSK_3C_HLADR_down             | BA          | 0.68 ± 0.03   | 0.67 ± 0.03 |
| BSK_3C_HLADR_down             | Brier score | 0.19 ± 0.01   | 0.19 ± 0.01 |
| BSK_3C_HLADR_down             | Log loss    | 0.56 ± 0.02   | 0.56 ± 0.01 |
| BSK_3C_Proliferation_down     | BA          | 0.71 ± 0.04   | 0.72 ± 0.03 |
| BSK_3C_Proliferation_down     | Brier score | 0.19 ± 0.01   | 0.19 ± 0.01 |
| BSK_3C_Proliferation_down     | Log loss    | 0.56 ± 0.03   | 0.56 ± 0.03 |
| BSK_3C_SRB_down               | BA          | 0.63 ± 0.05   | 0.66 ± 0.04 |
| BSK_3C_SRB_down               | Brier score | 0.18 ± 0.01   | 0.18 ± 0.01 |
| BSK_3C_SRB_down               | Log loss    | 0.54 ± 0.03   | 0.53 ± 0.03 |
| BSK_3C_Vis_down               | BA          | 0.62 ± 0.03   | 0.63 ± 0.03 |
| BSK_3C_Vis_down               | Brier score | 0.17 ± 0.01   | 0.17 ± 0.01 |
| BSK_3C_Vis_down               | Log loss    | 0.51 ± 0.02   | 0.51 ± 0.02 |
| BSK_4H_Eotaxin3_down          | BA          | 0.59 ± 0.01   | 0.62 ± 0.03 |
| BSK_4H_Eotaxin3_down          | Brier score | 0.18 ± 0.00   | 0.18 ± 0.00 |
| BSK_4H_Eotaxin3_down          | Log loss    | 0.54 ± 0.01   | 0.53 ± 0.01 |
| BSK_CASM3C_Proliferation_down | BA          | 0.59 ± 0.01   | 0.61 ± 0.01 |
| BSK_CASM3C_Proliferation_down | Brier score | 0.18 ± 0.00   | 0.18 ± 0.00 |
| BSK_CASM3C_Proliferation_down | Log loss    | 0.53 ± 0.01   | 0.53 ± 0.01 |
| BSK_LPS_VCAM1_down            | BA          | 0.61 ± 0.01   | 0.63 ± 0.01 |
| BSK_LPS_VCAM1_down            | Brier score | 0.17 ± 0.00   | 0.17 ± 0.00 |
| BSK_LPS_VCAM1_down            | Log loss    | 0.52 ± 0.01   | 0.52 ± 0.01 |
| BSK_SAg_CD38_down             | BA          | 0.64 ± 0.02   | 0.64 ± 0.02 |
| BSK_SAg_CD38_down             | Brier score | 0.17 ± 0.01   | 0.17 ± 0.01 |
| BSK_SAg_CD38_down             | Log loss    | 0.51 ± 0.02   | 0.51 ± 0.02 |
| BSK_SAg_CD40_down             | BA          | 0.63 ± 0.04   | 0.63 ± 0.03 |
| BSK_SAg_CD40_down             | Brier score | 0.17 ± 0.01   | 0.17 ± 0.01 |
| BSK_SAg_CD40_down             | Log loss    | 0.52 ± 0.03   | 0.51 ± 0.03 |
| BSK_SAg_Proliferation_down    | BA          | 0.65 ± 0.02   | 0.67 ± 0.04 |
| BSK_SAg_Proliferation_down    | Brier score | 0.20 ± 0.02   | 0.19 ± 0.02 |
| BSK_SAg_Proliferation_down    | Log loss    | 0.57 ± 0.04   | 0.57 ± 0.04 |
| BSK_hDFCGF_CollagenIII_down   | BA          | 0.59 ± 0.03   | 0.63 ± 0.03 |
| BSK_hDFCGF_CollagenIII_down   | Brier score | 0.17 ± 0.01   | 0.17 ± 0.01 |
| BSK_hDFCGF_CollagenIII_down   | Log loss    | 0.51 ± 0.02   | 0.50 ± 0.02 |
| BSK_hDFCGF_Proliferation_down | BA          | 0.68 ± 0.02   | 0.69 ± 0.02 |
| BSK_hDFCGF_Proliferation_down | Brier score | 0.20 ± 0.01   | 0.20 ± 0.00 |
| BSK_hDFCGF_Proliferation_down | Log loss    | 0.58 ± 0.01   | 0.57 ± 0.01 |
| CEETOX_H295R_11DCORT_dn       | BA          | 0.57 ± 0.02   | 0.64 ± 0.05 |
| CEETOX_H295R_11DCORT_dn       | Brier score | 0.22 ± 0.00   | 0.21 ± 0.01 |
| CEETOX_H295R_11DCORT_dn       | Log loss    | 0.62 ± 0.01   | 0.60 ± 0.03 |
| CEETOX_H295R_ANDR_dn          | BA          | 0.55 ± 0.03   | 0.62 ± 0.07 |
| CEETOX_H295R_ANDR_dn          | Brier score | 0.22 ± 0.01   | 0.21 ± 0.03 |
| CEETOX_H295R_ANDR_dn          | Log loss    | 0.62 ± 0.03   | 0.61 ± 0.06 |
| TOX21_ARE_BLA_agonist_ratio   | BA          | 0.52 ± 0.01   | 0.60 ± 0.01 |
| TOX21_ARE_BLA_agonist_ratio   | Brier score | 0.15 ± 0.00   | 0.14 ± 0.00 |
| TOX21_ARE_BLA_agonist_ratio   | Log loss    | 0.46 ± 0.01   | 0.44 ± 0.01 |
| TOX21_TR_LUC_GH3_Antagonist   | BA          | 0.69 ± 0.01   | 0.69 ± 0.01 |
| TOX21_TR_LUC_GH3_Antagonist   | Brier score | 0.11 ± 0.00   | 0.11 ± 0.00 |
| TOX21_TR_LUC_GH3_Antagonist   | Log loss    | 0.36 ± 0.01   | 0.36 ± 0.00 |

Table S4. Performance of models on test sets generated with agglomerative clustering and random splitting. Precision and recall values are reported as mean  $\pm$  standard deviation. Morgan FP is the Morgan count fingerprint.

| model           | Agglomerative clustering |                 | Precision       | Random<br>Recall |
|-----------------|--------------------------|-----------------|-----------------|------------------|
|                 | Precision                | Recall          |                 |                  |
| Morgan FP + KNN | 0.56 $\pm$ 0.12          | 0.24 $\pm$ 0.12 | 0.61 $\pm$ 0.09 | 0.30 $\pm$ 0.11  |
| Neural FP + KNN | 0.52 $\pm$ 0.10          | 0.38 $\pm$ 0.15 | 0.56 $\pm$ 0.08 | 0.41 $\pm$ 0.14  |
| Morgan FP + RF  | 0.58 $\pm$ 0.15          | 0.24 $\pm$ 0.19 | 0.66 $\pm$ 0.08 | 0.37 $\pm$ 0.15  |
| Neural FP + RF  | 0.57 $\pm$ 0.10          | 0.41 $\pm$ 0.18 | 0.63 $\pm$ 0.07 | 0.47 $\pm$ 0.15  |
| Morgan FP + SVC | 0.56 $\pm$ 0.10          | 0.49 $\pm$ 0.13 | 0.61 $\pm$ 0.08 | 0.52 $\pm$ 0.10  |
| Neural FP + SVC | 0.59 $\pm$ 0.09          | 0.44 $\pm$ 0.15 | 0.64 $\pm$ 0.08 | 0.46 $\pm$ 0.14  |
| Chemprop        | 0.57 $\pm$ 0.09          | 0.51 $\pm$ 0.13 | 0.63 $\pm$ 0.07 | 0.52 $\pm$ 0.10  |
| Cal. Chemprop   | 0.53 $\pm$ 0.26          | 0.32 $\pm$ 0.23 | 0.58 $\pm$ 0.29 | 0.33 $\pm$ 0.24  |

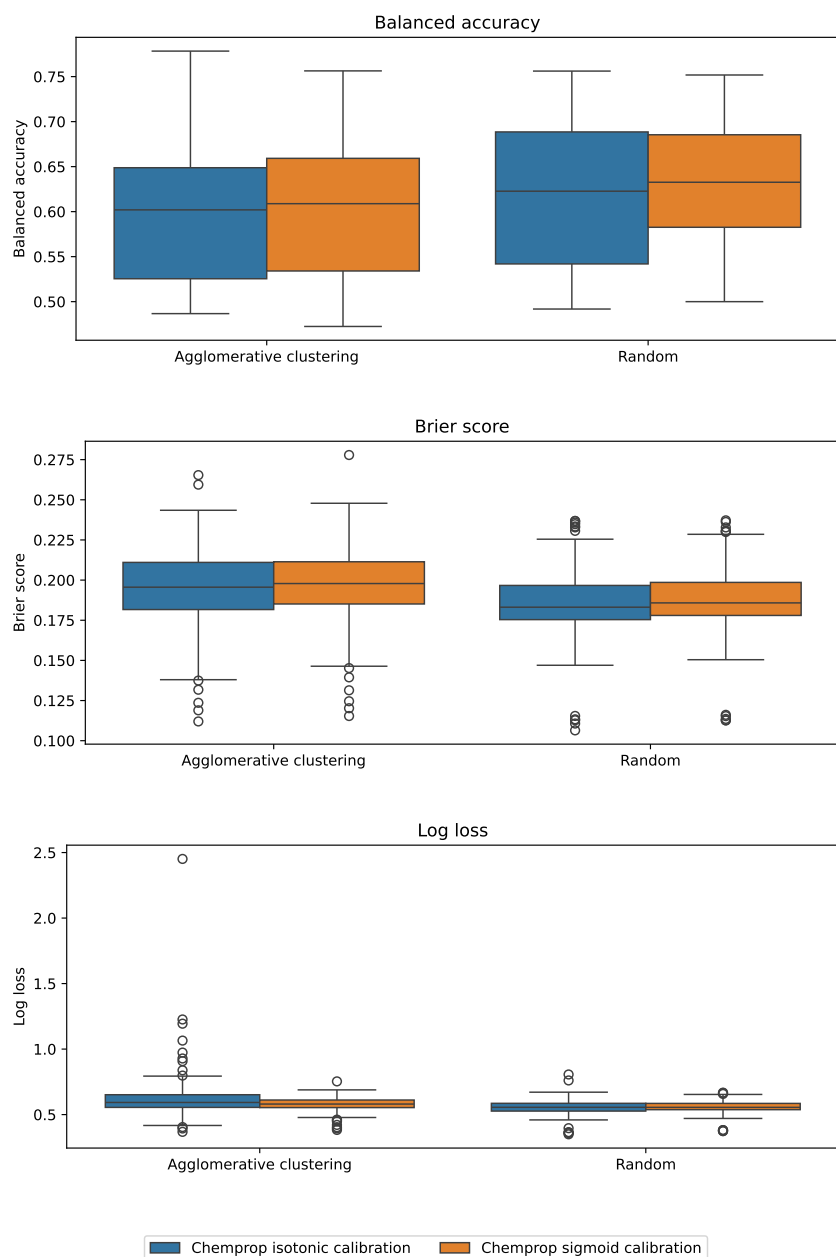

Fig. S1. Performance comparison of predictions and uncertainty estimates of Chemprop calibrated with isotonic regression and sigmoid calibration. The boxplots show the prediction performance (balanced accuracy, higher values are better) and uncertainty estimates (Brier score and Log loss, lower values are better) of all folds in the five-fold cross validation on the ToxCast subset (19 endpoints).

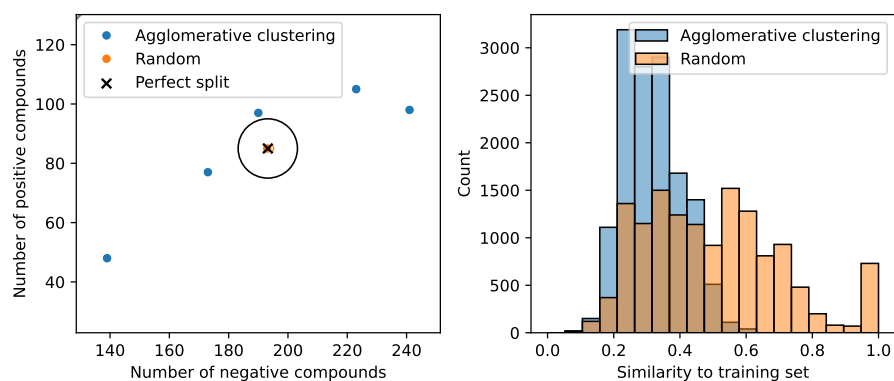

Fig. S2. Train/Test data distributions for BSK\_SAg\_CD40\_down endpoint. **Left:** The number of positive and negative labeled compounds in the folds obtained from clustering-based splitting (blue) and random splitting (orange). Dividing the total number of compounds of each class by five yields the optimal composition of a fold (black x), which is closely matched by the random split. The circle indicates a hypothetical fold with a radius of 10 compounds. Due to the clustering's constraints, only one fold ended up close to this area, while the remaining four folds differed in size and composition. **Right:** The similarity to the nearest training set neighbor for each test set compound across all five-folds. Similarity values of less than 0.3 to 0.4 indicate only a limited relation between test and training sets. On the other hand, folds obtained from the random split were significantly more similar, where some test compounds had similarities to the training compounds close to 1.

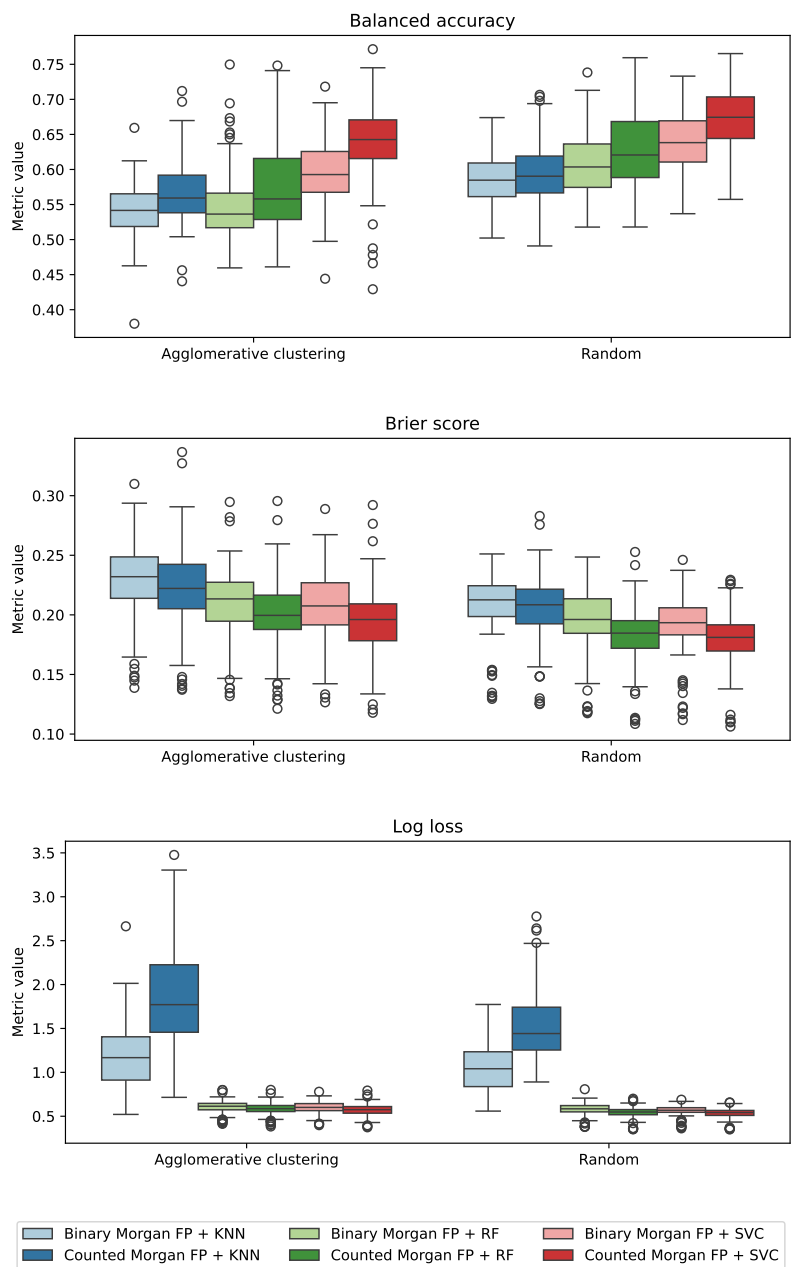

Fig. S3. Performance of Morgan binary fingerprints and Morgan count fingerprints. Performance of predictions (balanced accuracy, higher values are better) and uncertainty estimates (Brier score and Log loss, lower values are better) of all folds in the five-fold cross validation on the ToxCast subset (19 endpoints).



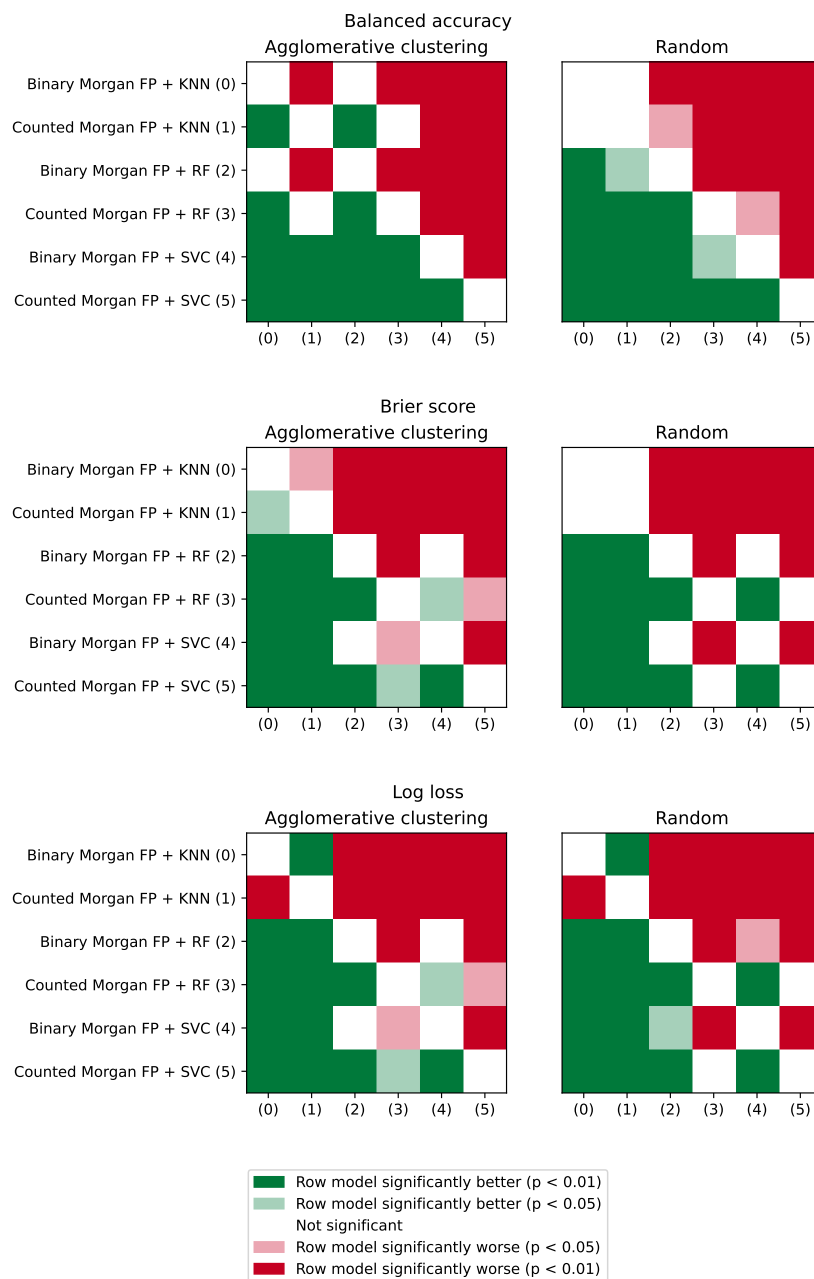

Fig. S4. Significance test comparison of Morgan binary fingerprints and Morgan count fingerprints in the five-fold cross validation on the ToxCast subset (19 endpoints) using one-sided Mann Whitney U test.

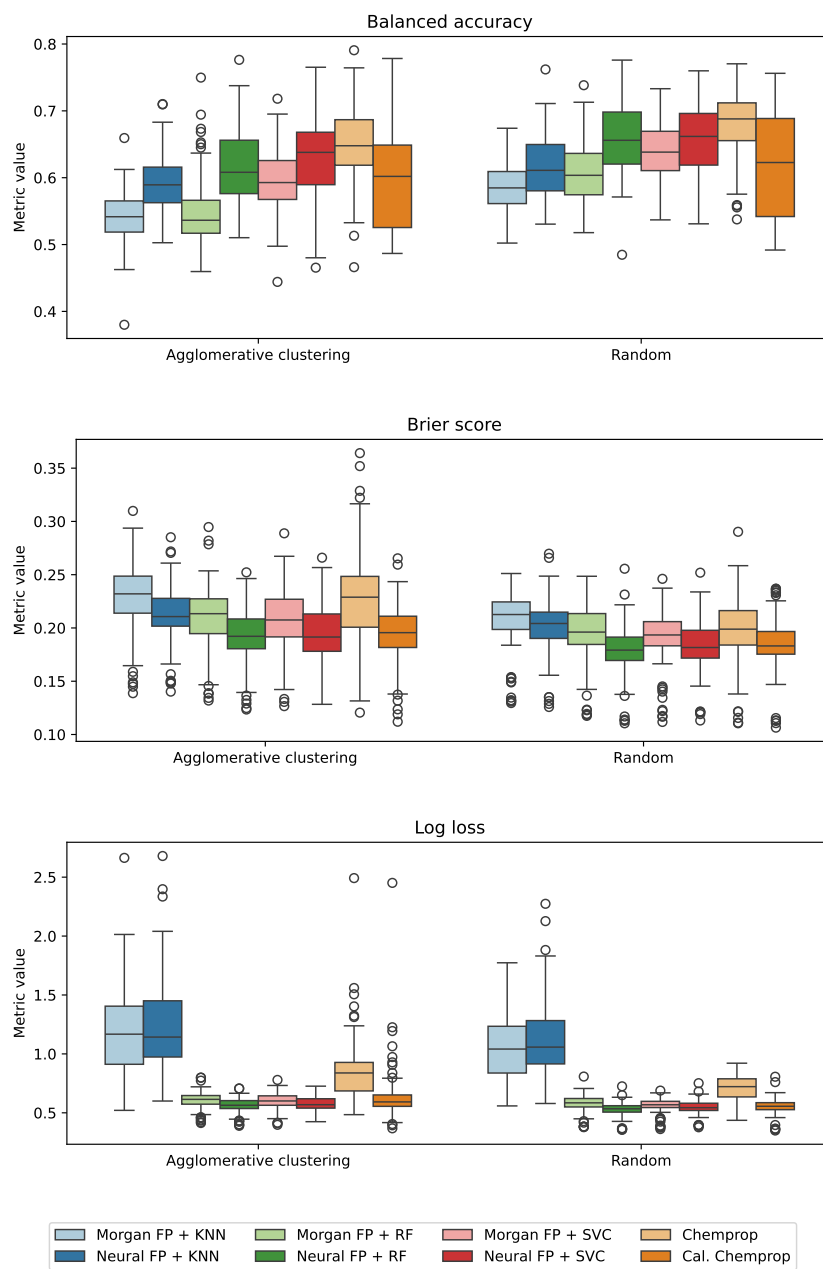

Fig. S5. Performance of Morgan binary fingerprints and neural fingerprints from Chemprop. Performance of predictions (balanced accuracy, higher values are better) and uncertainty estimates (Brier score and Log loss, lower values are better) of all folds in the five-fold cross validation on the ToxCast subset (19 endpoints).

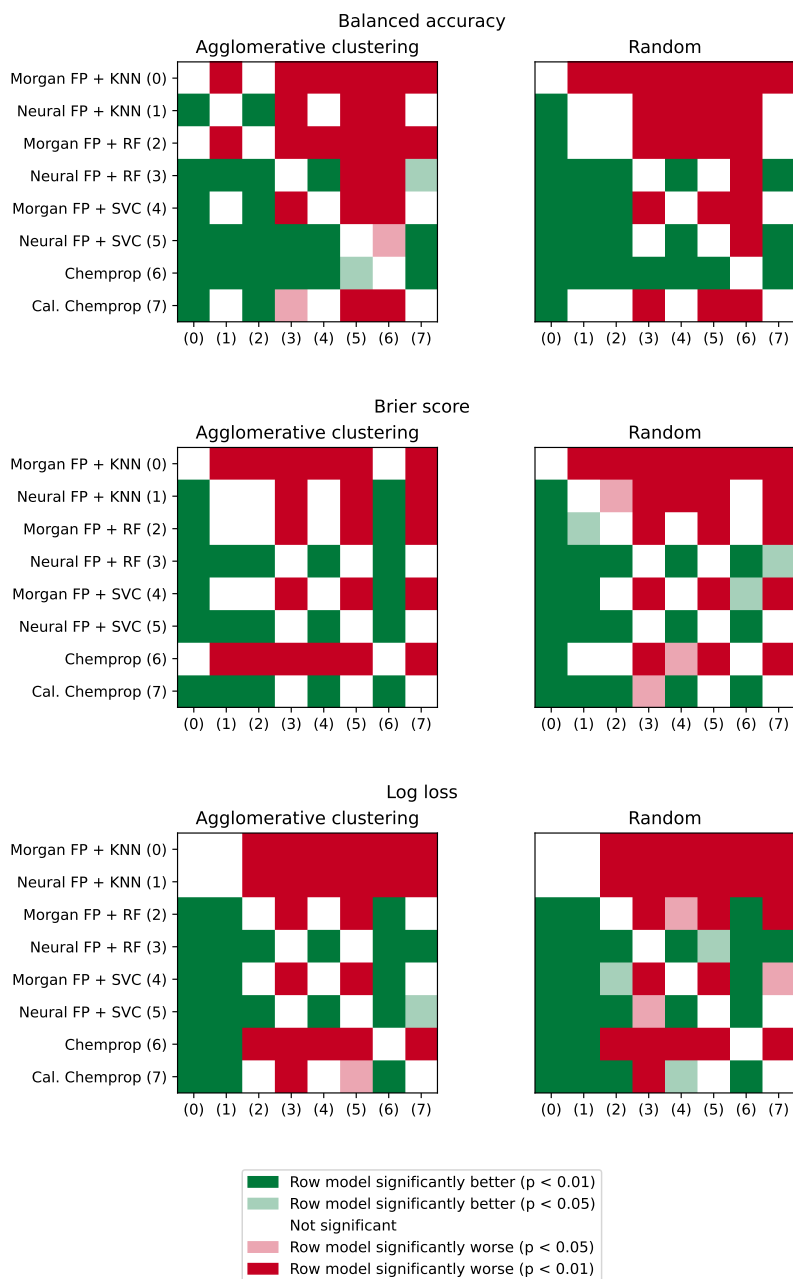

Fig. S6. Significance test comparison of Morgan binary fingerprints and neural fingerprints from Chemprop in the five-fold cross validation on the ToxCast subset (19 endpoints) using one-sided Mann Whitney U test.

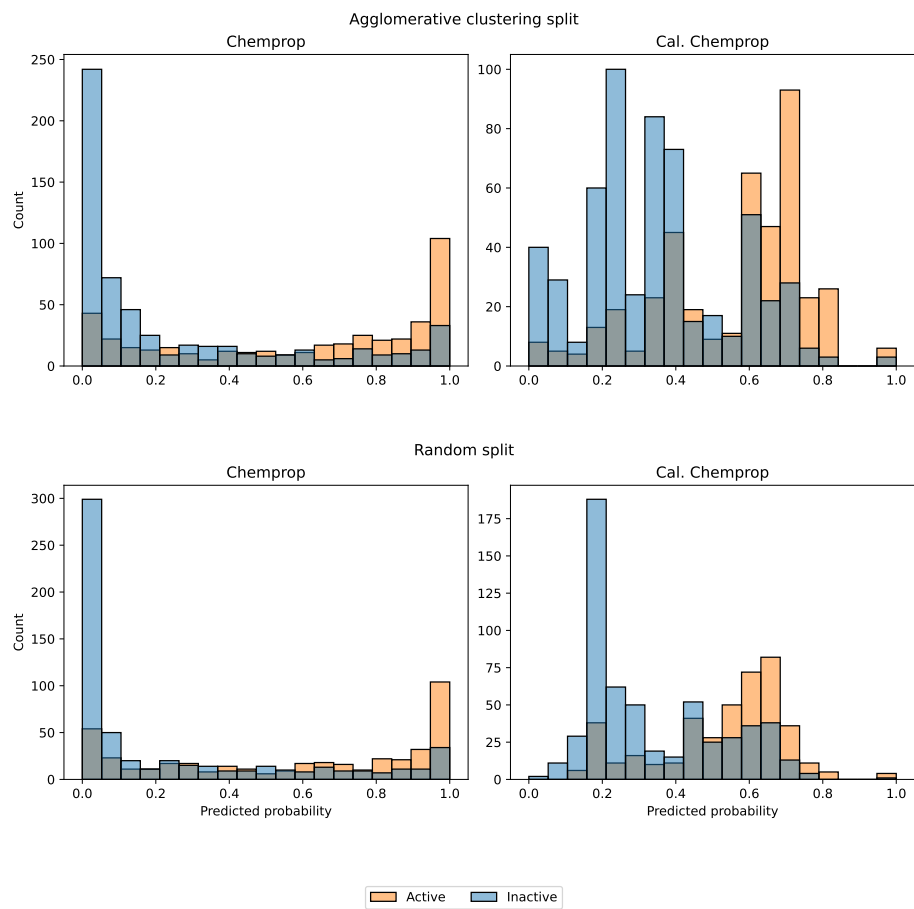

Fig. S7. Distributions of predicted probabilities of Chemprop and calibrated Chemprop on the APR\_HepG2\_CellLoss\_72h\_dn ToxCast endpoint.

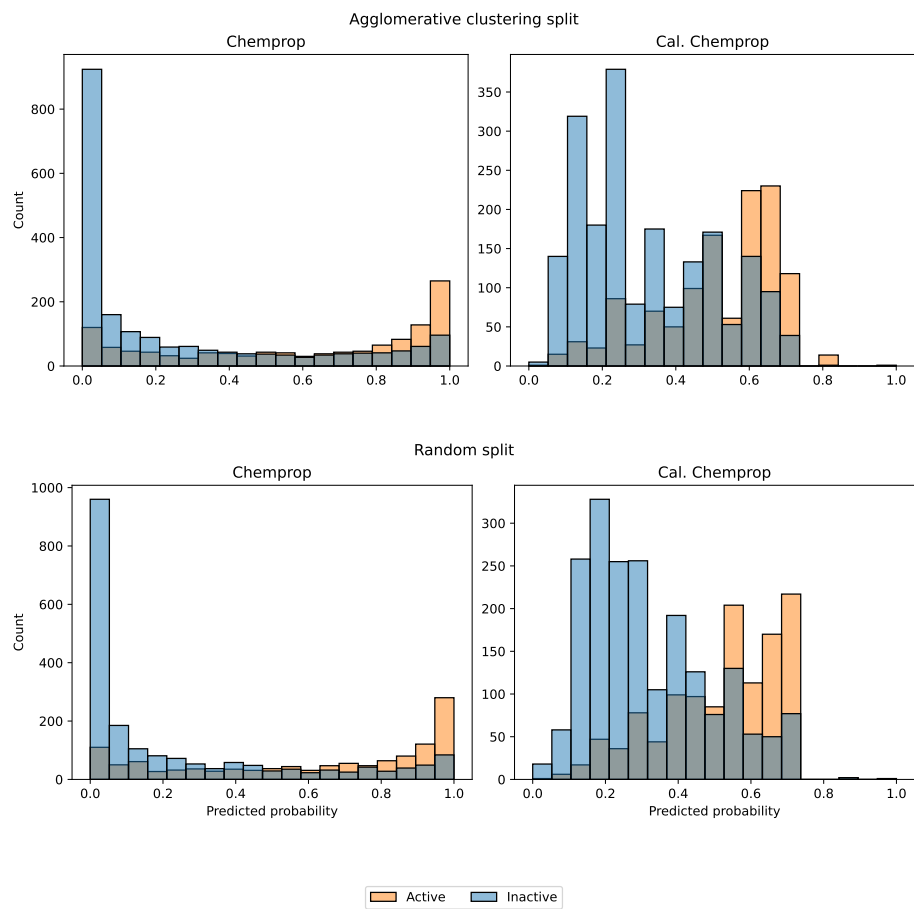

Fig. S8. Distributions of predicted probabilities of Chemprop and calibrated Chemprop on the ATG\_NRF2\_ARE\_CIS\_up ToxCast endpoint.

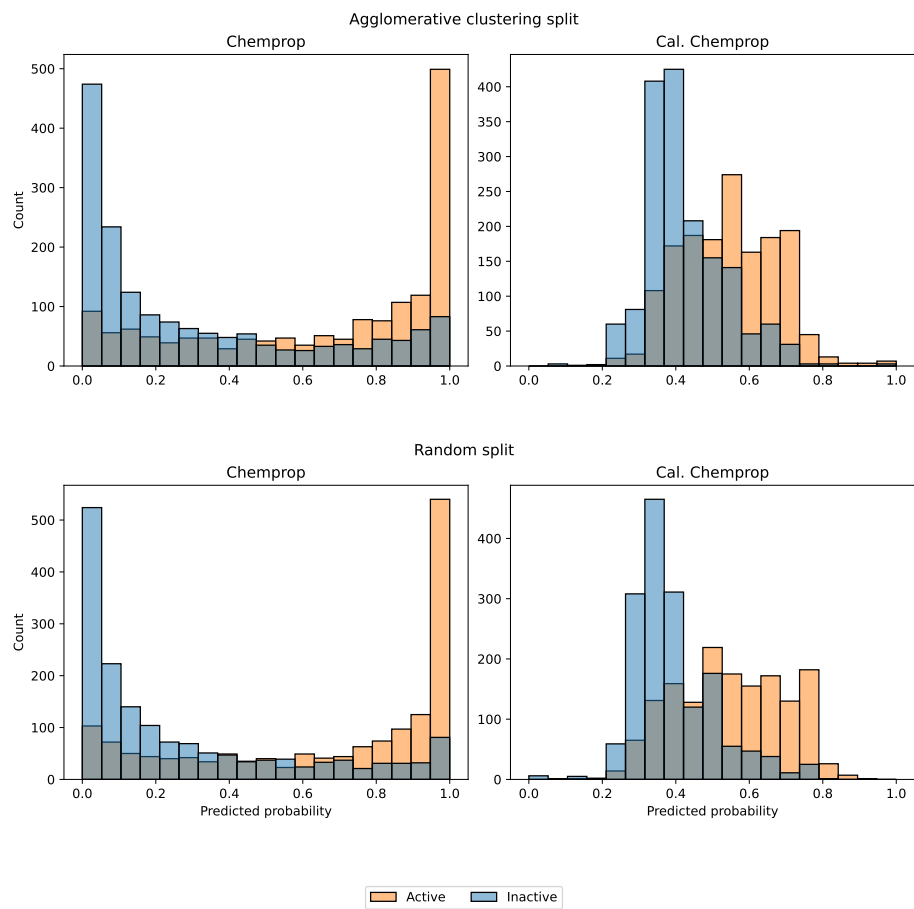

Fig. S9. Distributions of predicted probabilities of Chemprop and calibrated Chemprop on the ATG\_PXRE\_CIS\_up ToxCast endpoint.

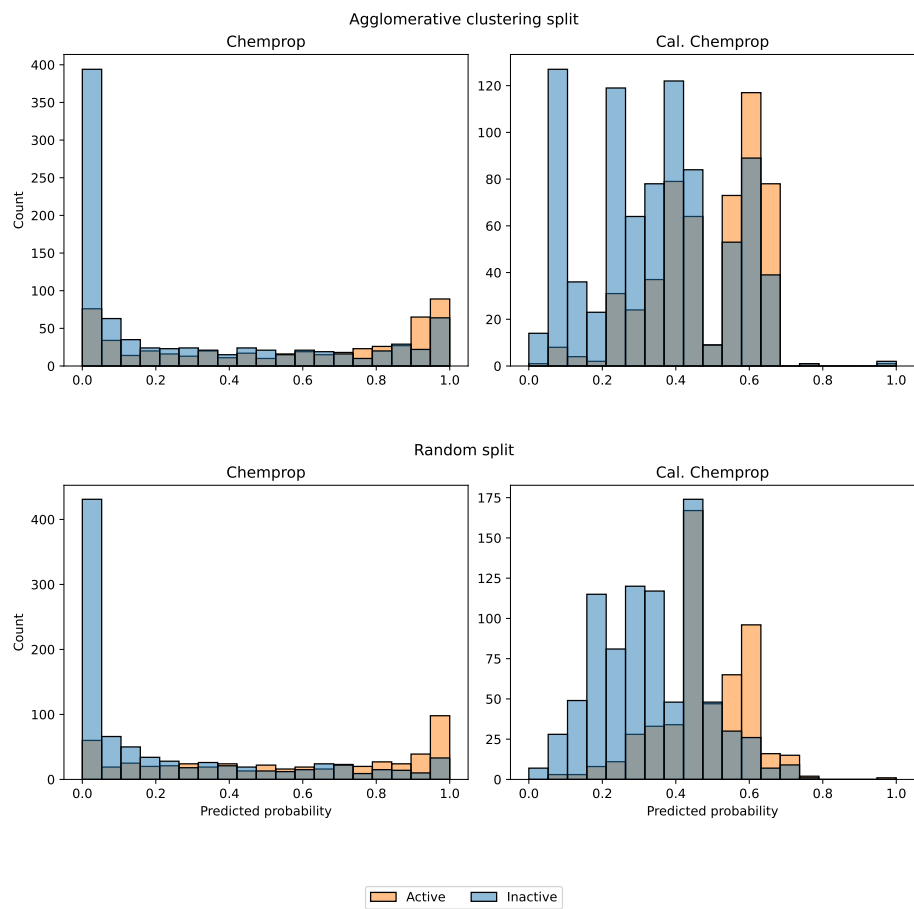

Fig. S10. Distributions of predicted probabilities of Chemprop and calibrated Chemprop on the BSK\_3C\_HLADR\_down ToxCast endpoint.

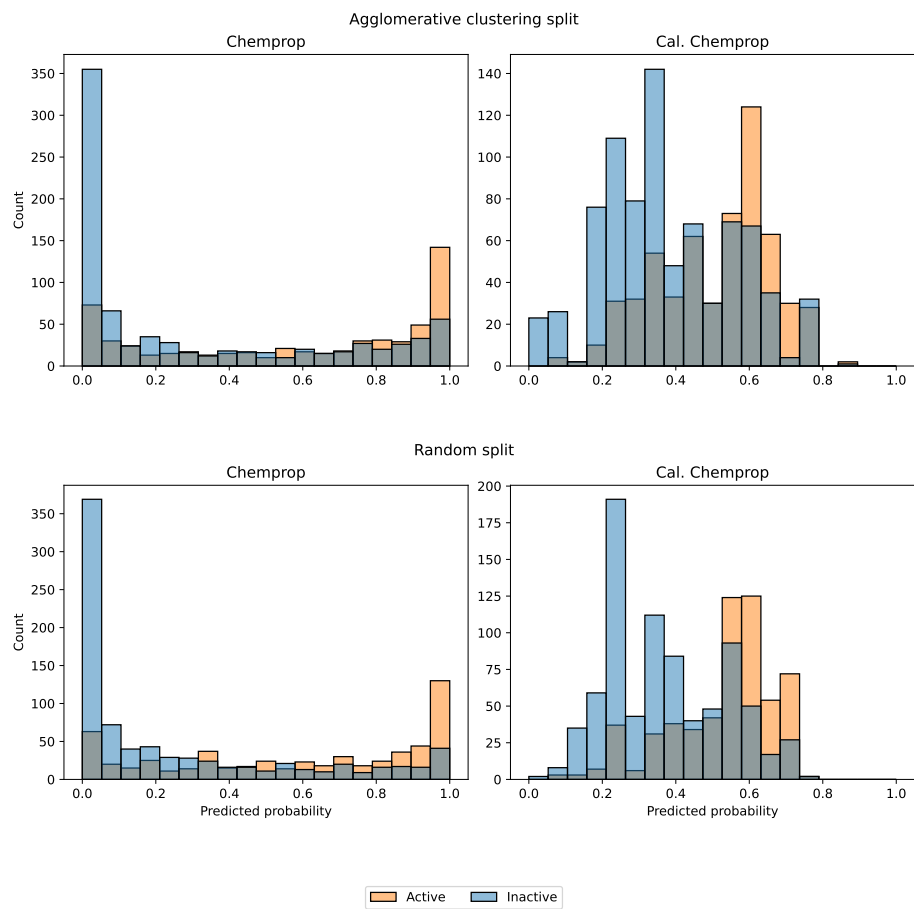

Fig. S11. Distributions of predicted probabilities of Chemprop and calibrated Chemprop on the BSK\_3C\_Proliferation\_down ToxCast endpoint.



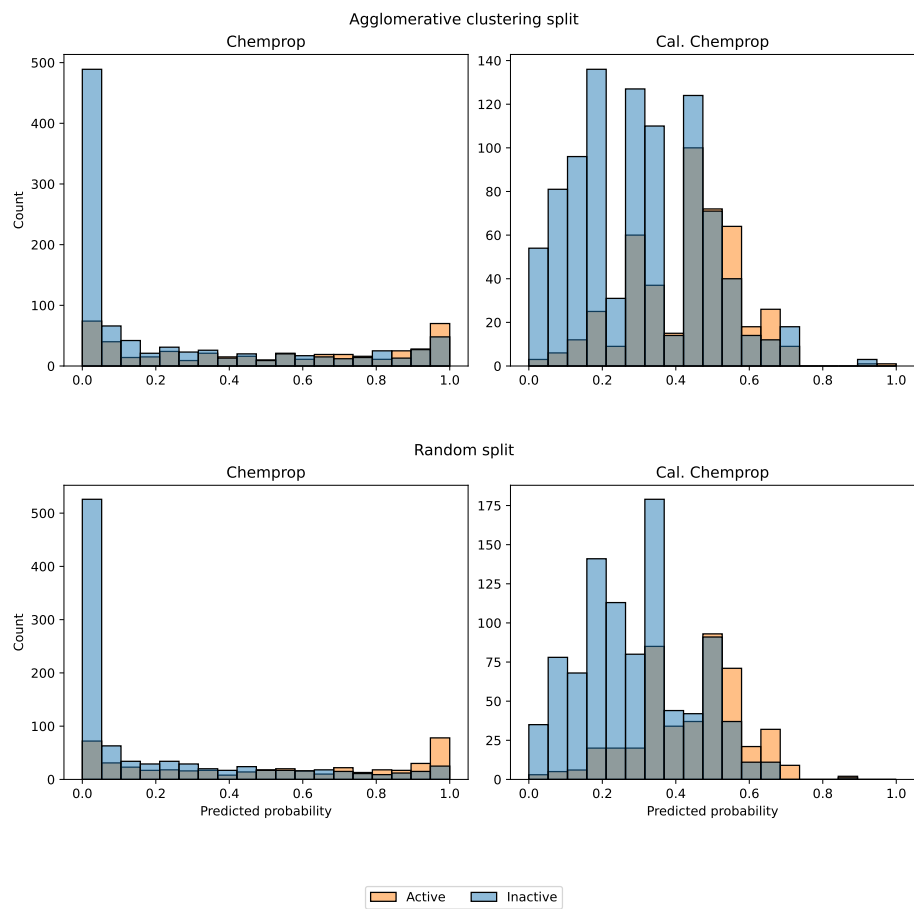

Fig. S12. Distributions of predicted probabilities of Chemprop and calibrated Chemprop on the BSK\_3C\_SRB\_down ToxCast endpoint.

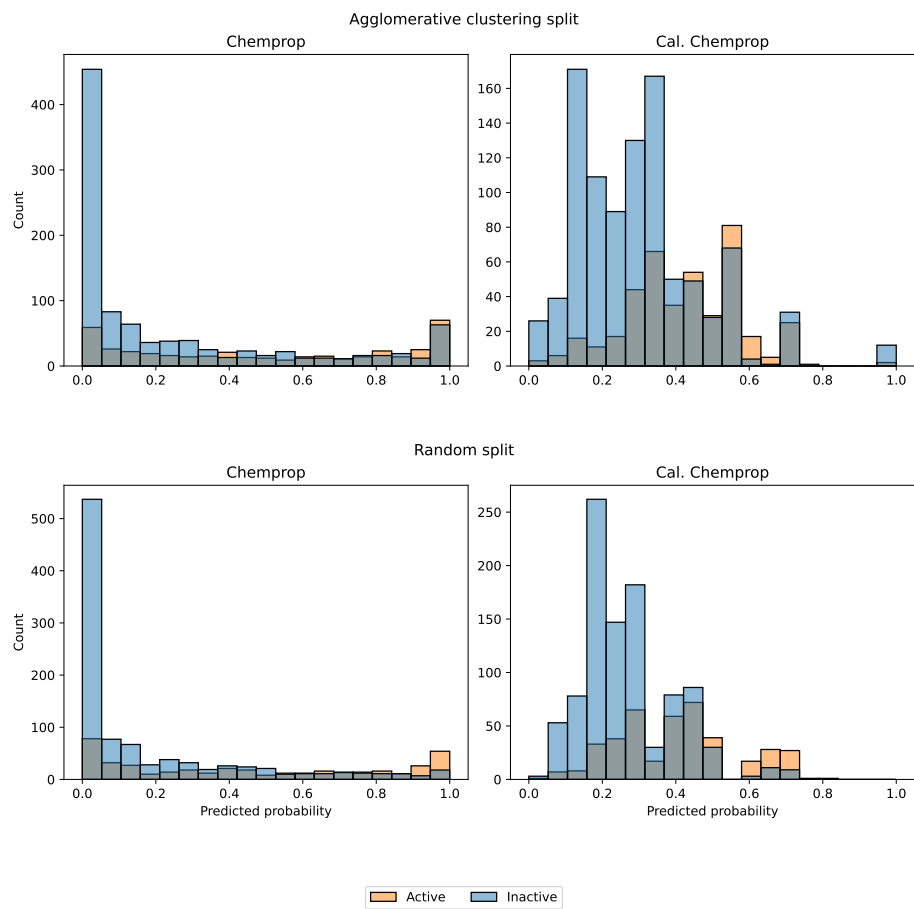

Fig. S13. Distributions of predicted probabilities of Chemprop and calibrated Chemprop on the BSK\_3C\_Vis\_down ToxCast endpoint.

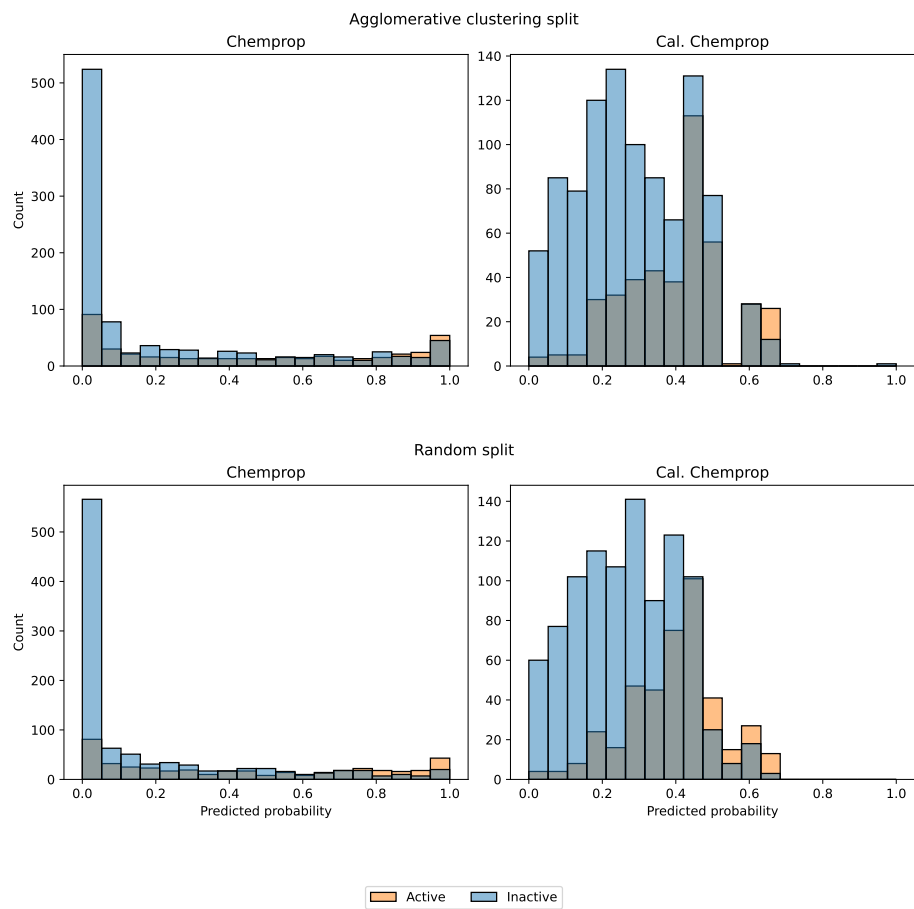

Fig. S14. Distributions of predicted probabilities of Chemprop and calibrated Chemprop on the BSK\_4H\_Eotaxin3\_down ToxCast endpoint.

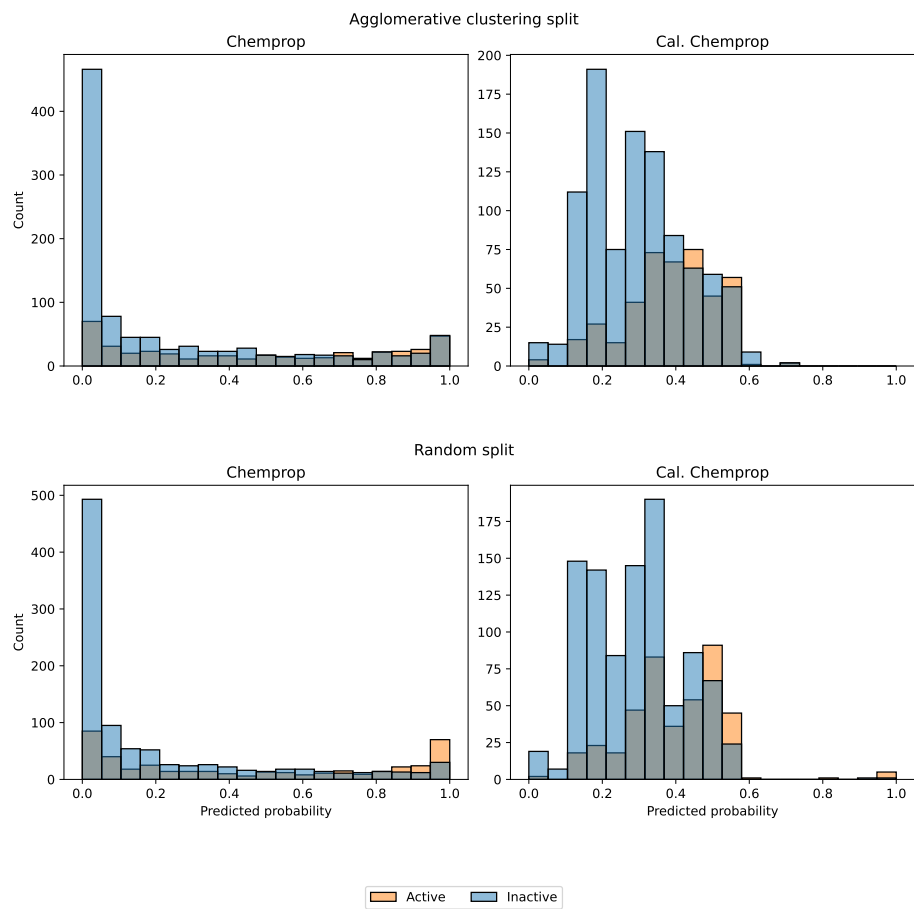

Fig. S15. Distributions of predicted probabilities of Chemprop and calibrated Chemprop on the BSK\_CASM3C\_Proliferation\_down ToxCast endpoint.

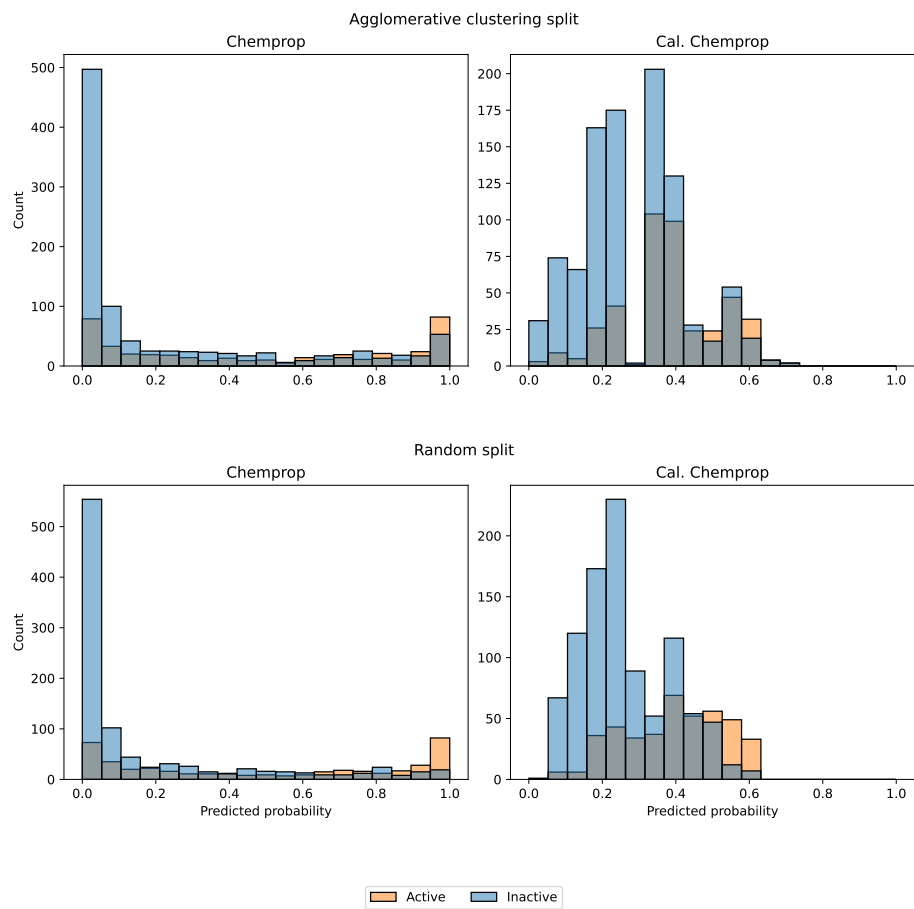

Fig. S16. Distributions of predicted probabilities of Chemprop and calibrated Chemprop on the BSK\_LPS\_VCAM1\_down ToxCast endpoint.

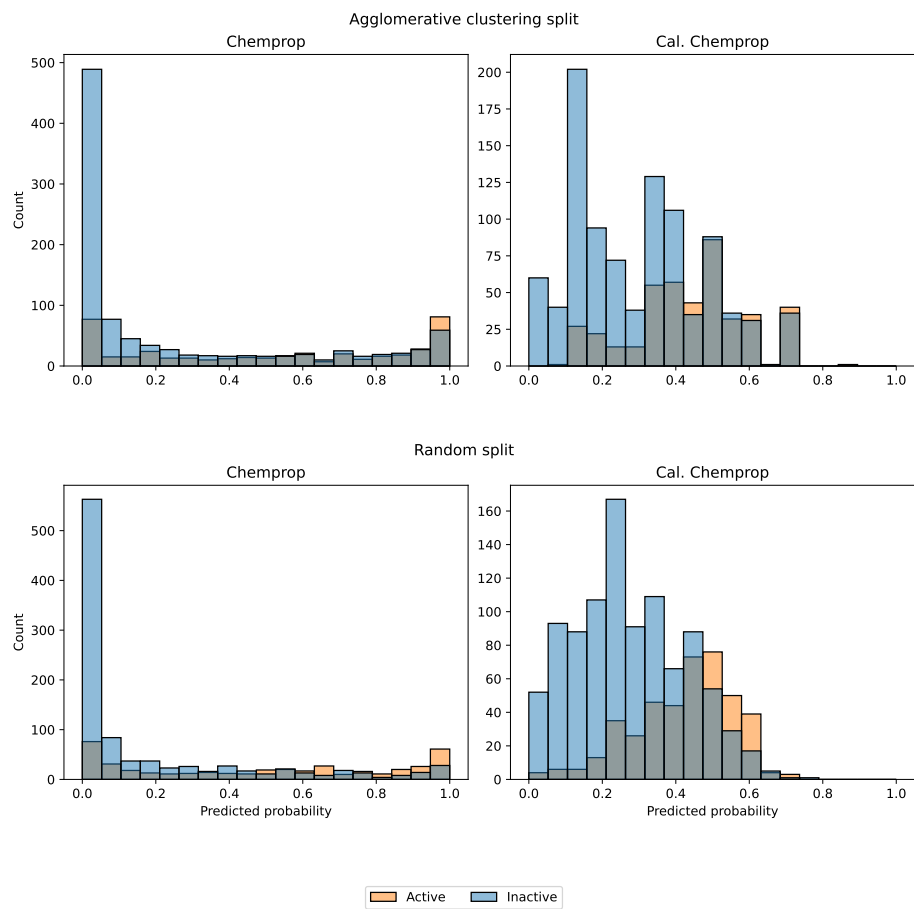

Fig. S17. Distributions of predicted probabilities of Chemprop and calibrated Chemprop on the BSK\_SAg\_CD38\_down ToxCast endpoint.

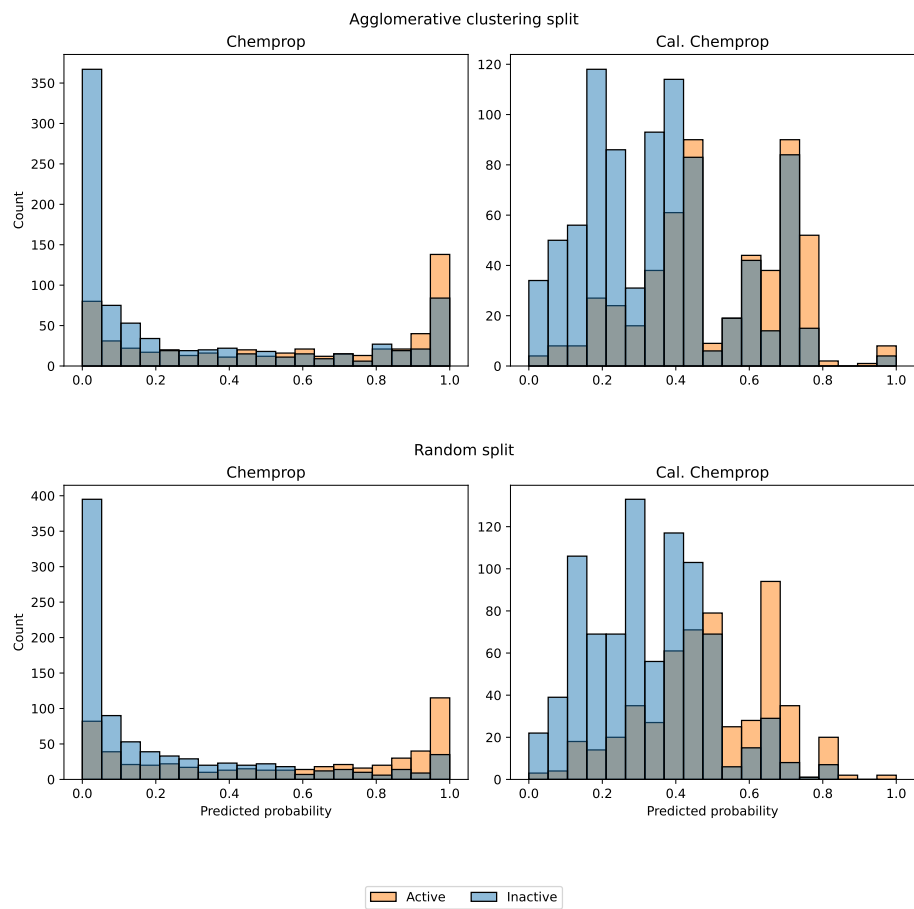

Fig. S18. Distributions of predicted probabilities of Chemprop and calibrated Chemprop on the BSK\_SAg\_Proliferation\_down ToxCast endpoint.

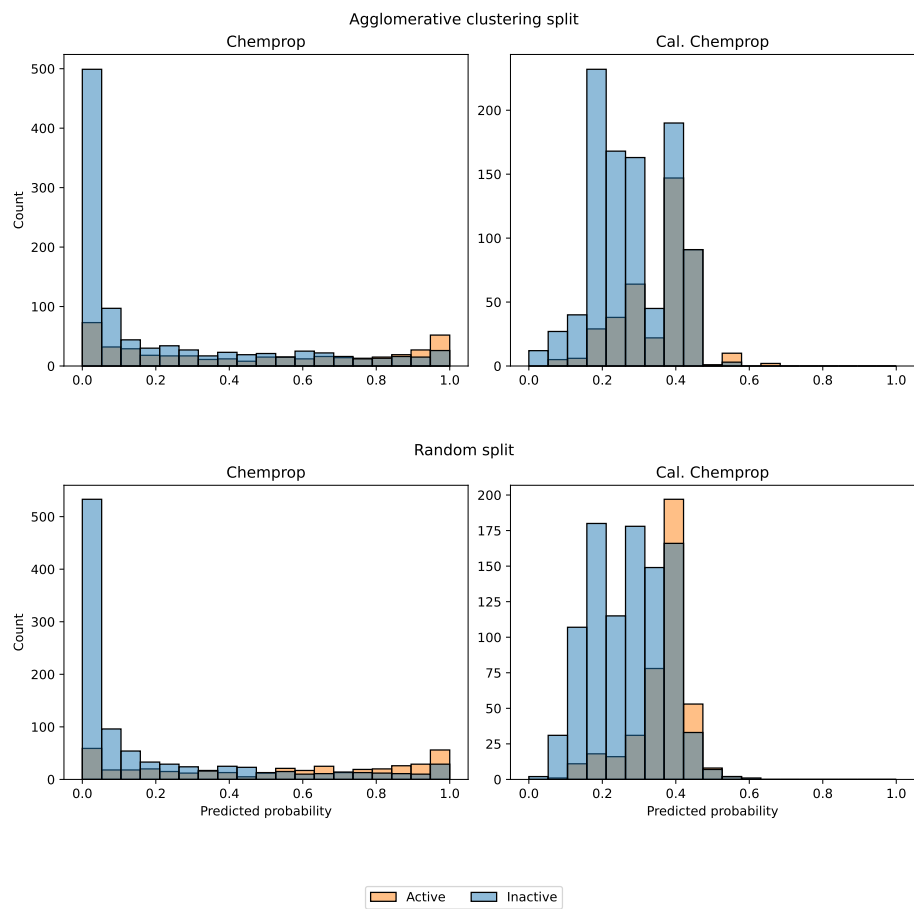

Fig. S19. Distributions of predicted probabilities of Chemprop and calibrated Chemprop on the BSK\_hDFCGF\_CollagenIII\_down ToxCast endpoint.



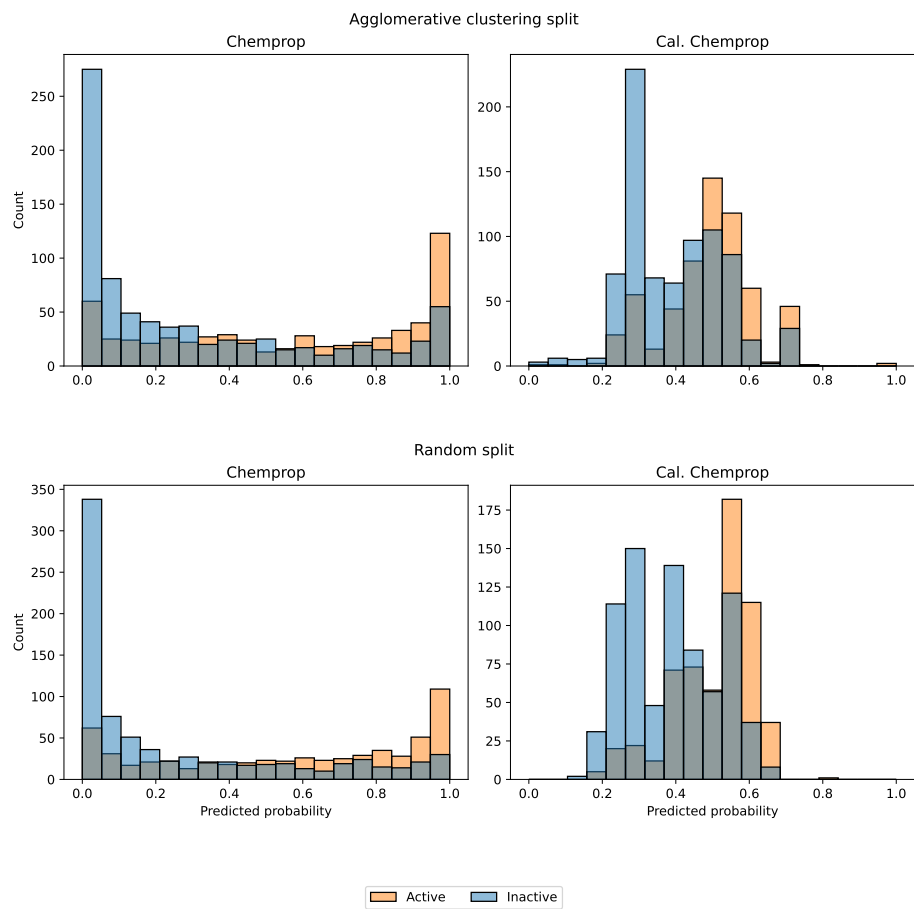

Fig. S20. Distributions of predicted probabilities of Chemprop and calibrated Chemprop on the BSK\_hDFCGF\_Proliferation\_down ToxCast endpoint.

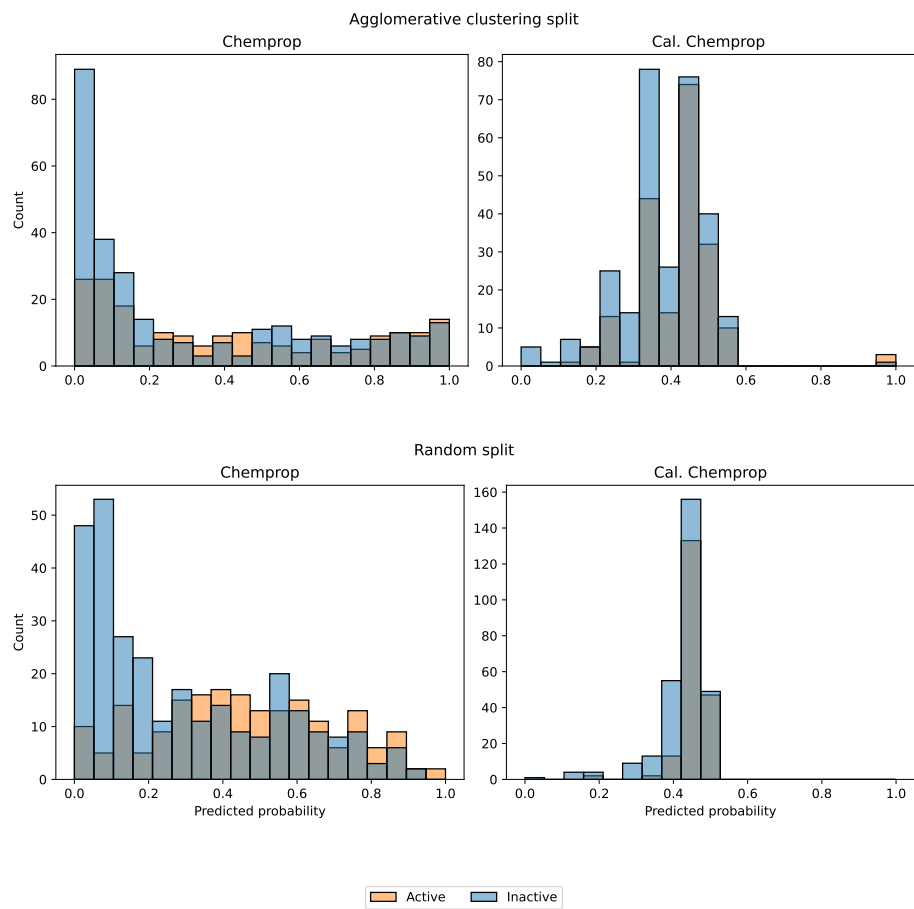

Fig. S21. Distributions of predicted probabilities of Chemprop and calibrated Chemprop on the CEETOX\_H295R\_11DCORT\_dn ToxCast endpoint.

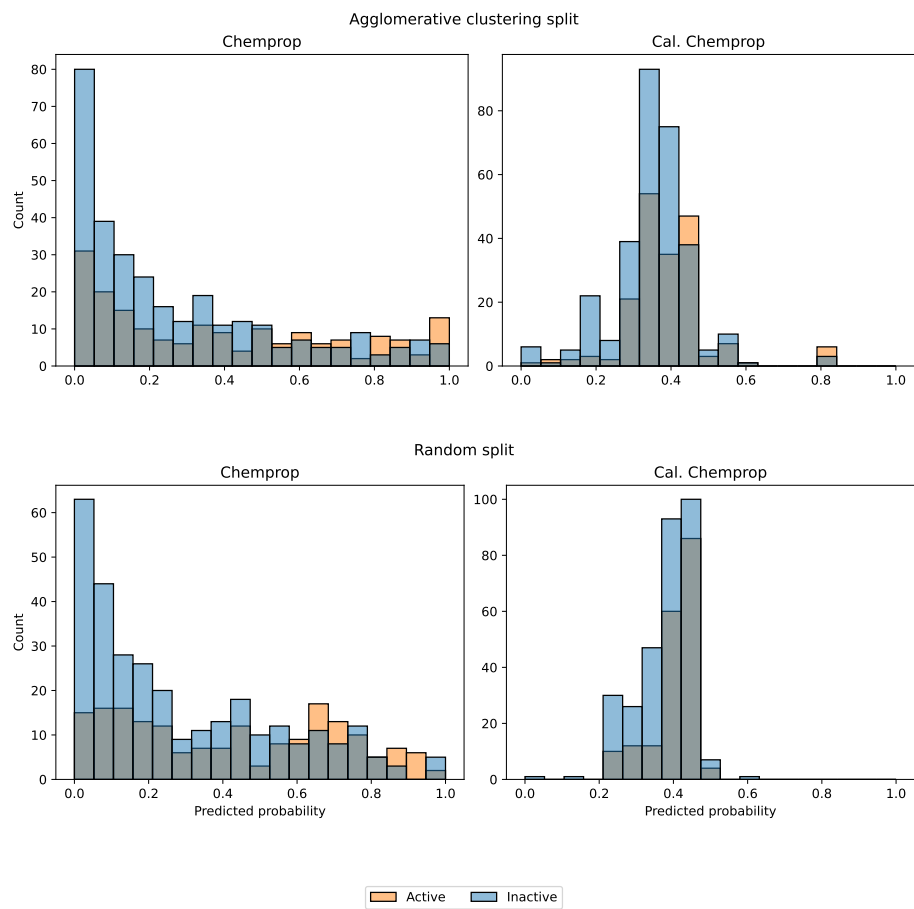

Fig. S22. Distributions of predicted probabilities of Chemprop and calibrated Chemprop on the CEETOX\_H295R\_ANDR\_dn ToxCast endpoint.

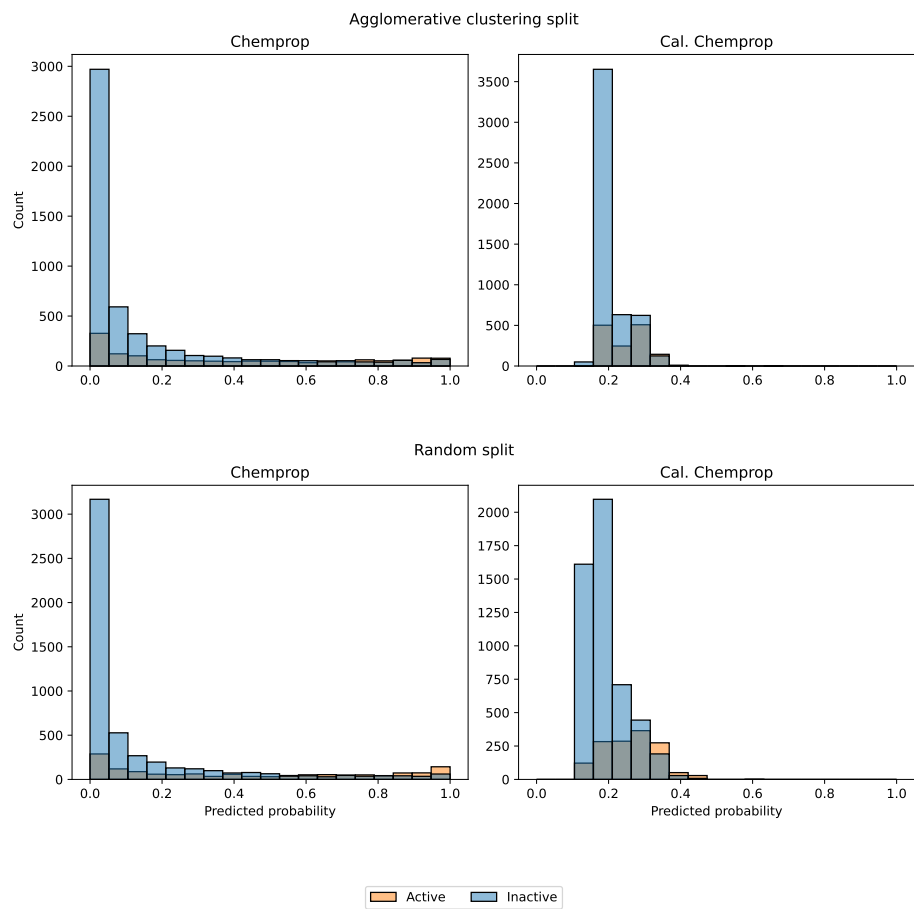

Fig. S23. Distributions of predicted probabilities of Chemprop and calibrated Chemprop on the TOX21\_ARE\_BLA\_agonist\_ratio ToxCast endpoint.

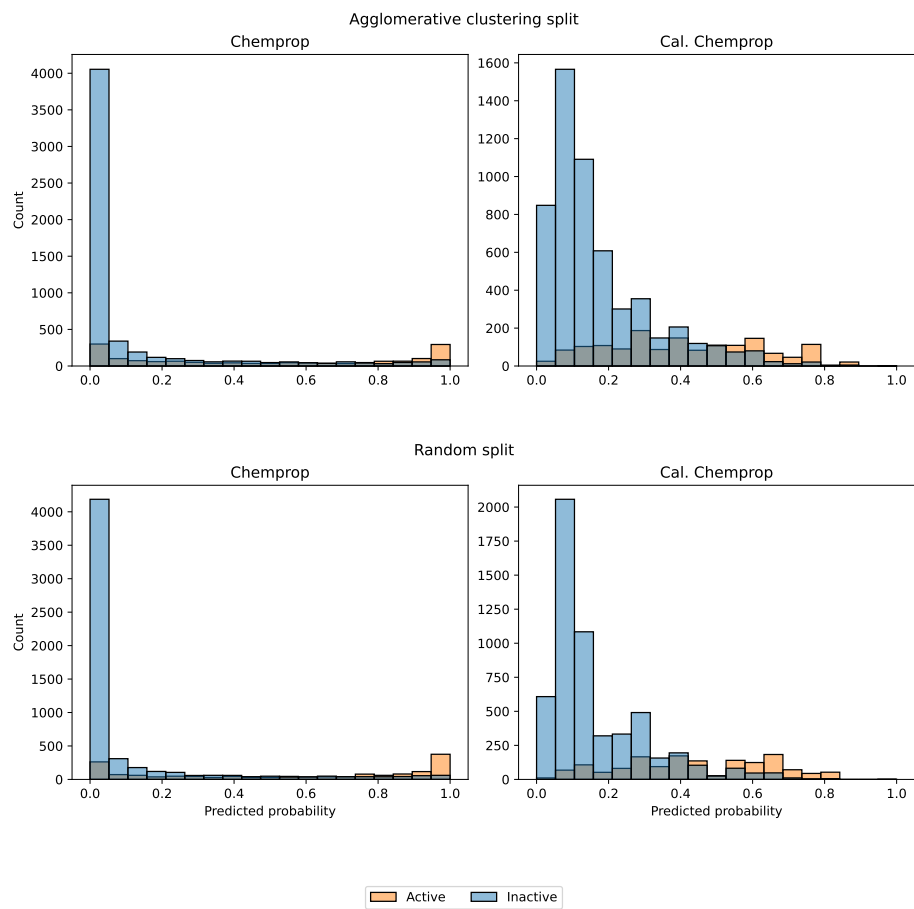

Fig. S24. Distributions of predicted probabilities of Chemprop and calibrated Chemprop on the TOX21\_TR\_LUC\_GH3\_Antagonist ToxCast endpoint.

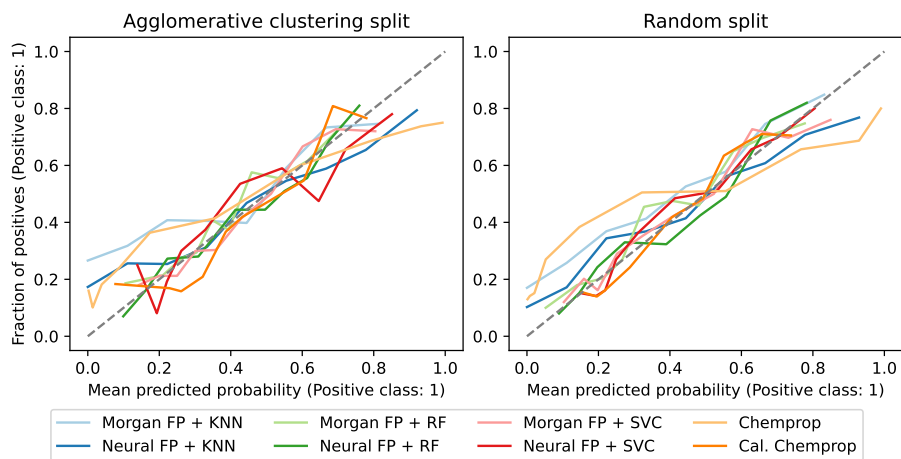

Fig. S25. Calibration curves for endpoint APR\_HepG2\_CellLoss\_72h\_dn.

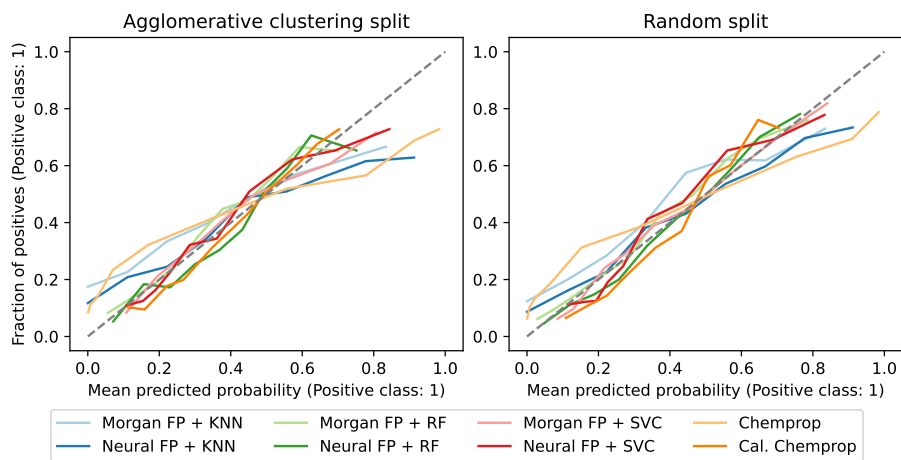

Fig. S26. Calibration curves for endpoint ATG\_NRF2\_ARE\_CIS\_up.

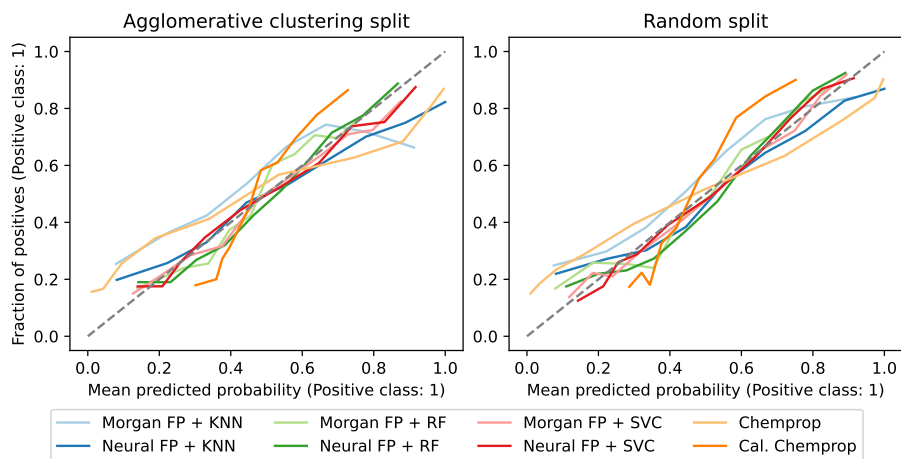

Fig. S27. Calibration curves for endpoint ATG\_PXRE\_CIS\_up.

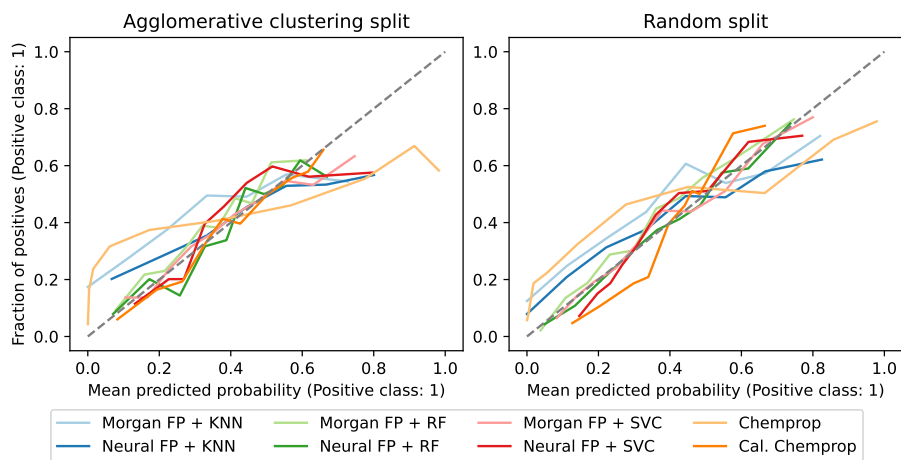

Fig. S28. Calibration curves for endpoint BSK\_3C\_HLADR\_down.

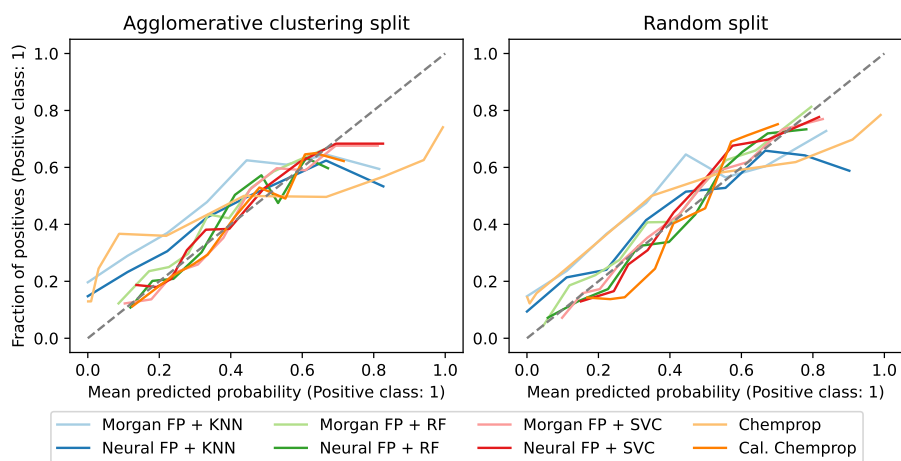

Fig. S29. Calibration curves for endpoint BSK\_3C\_Proliferation\_down.

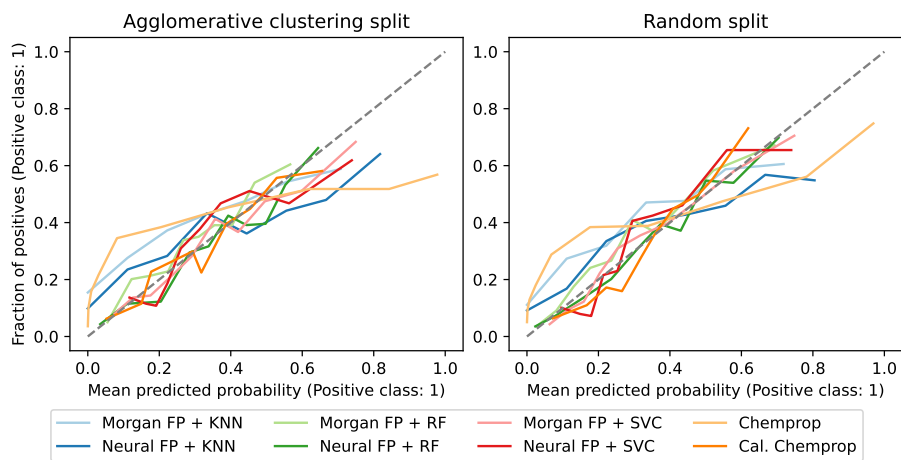

Fig. S30. Calibration curves for endpoint BSK\_3C\_SRB\_down.



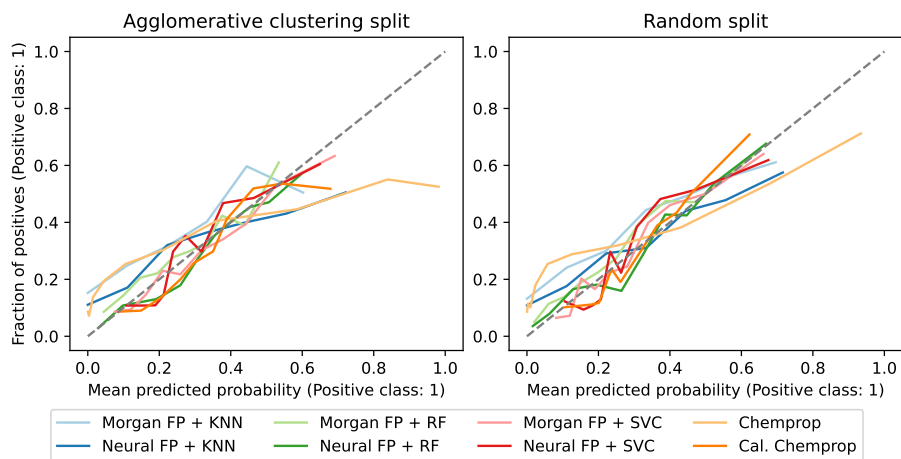

Fig. S31. Calibration curves for endpoint BSK\_3C\_Vis\_down.

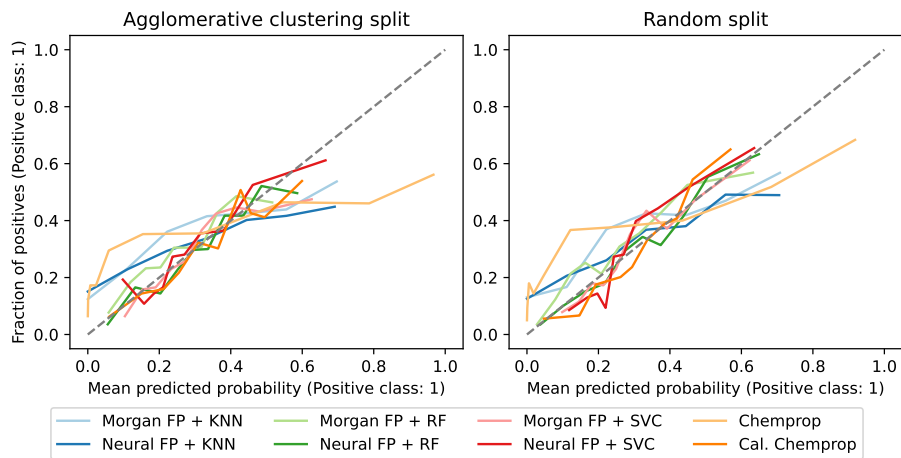

Fig. S32. Calibration curves for endpoint BSK\_4H\_Eotaxin3\_down.

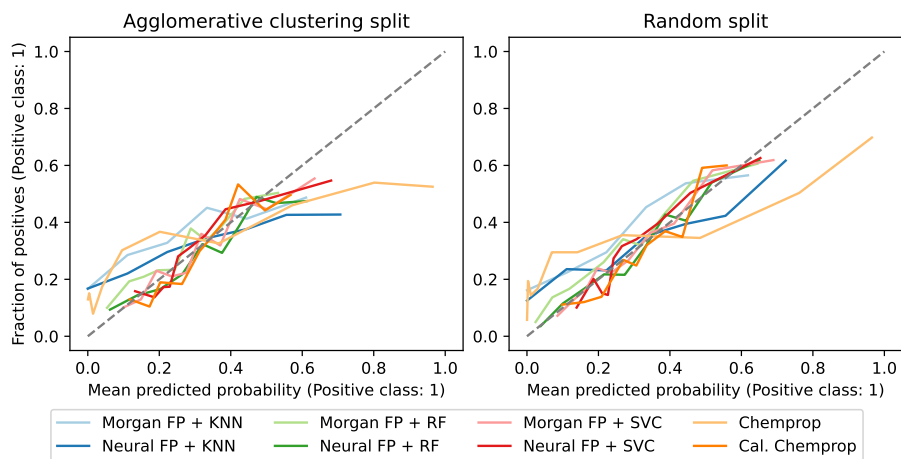

Fig. S33. Calibration curves for endpoint BSK\_CASM3C\_Proliferation\_down.

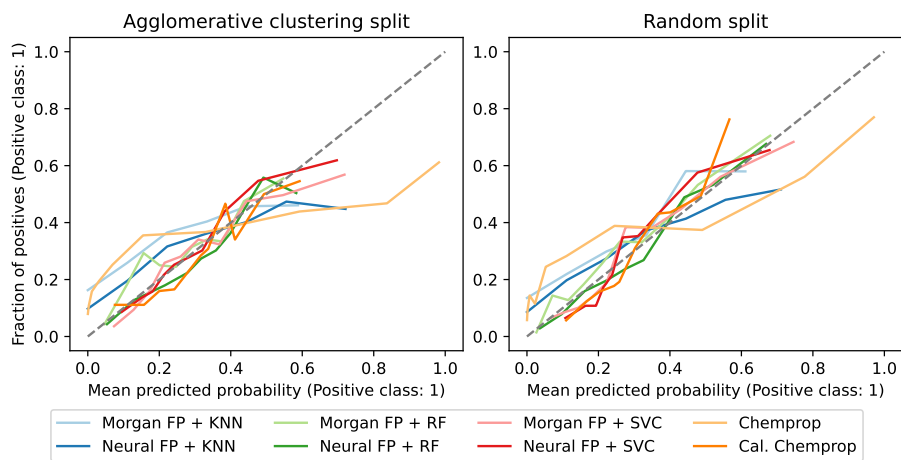

Fig. S34. Calibration curves for endpoint BSK\_LPS\_VCAM1\_down.

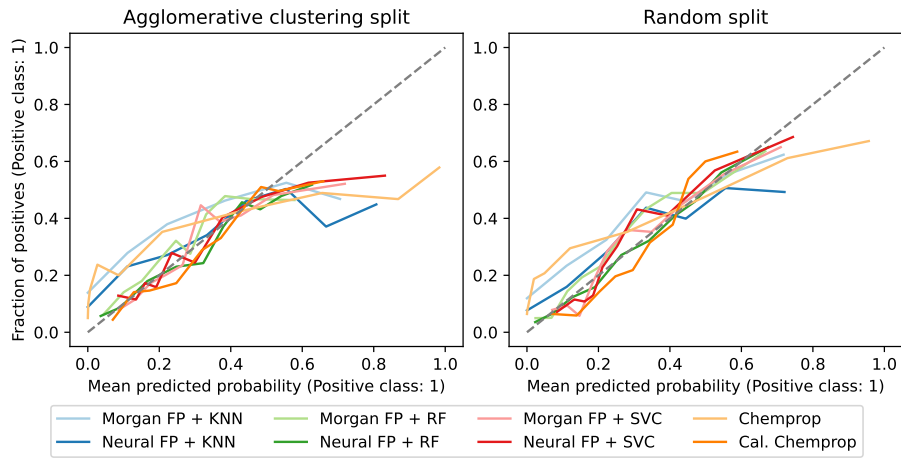

Fig. S35. Calibration curves for endpoint BSK\_SAg\_CD38\_down.

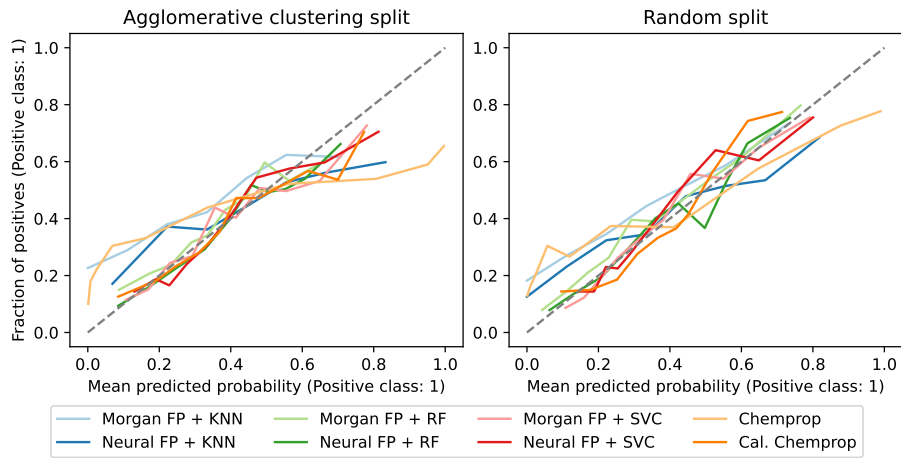

Fig. S36. Calibration curves for endpoint BSK\_SAg\_Proliferation\_down.

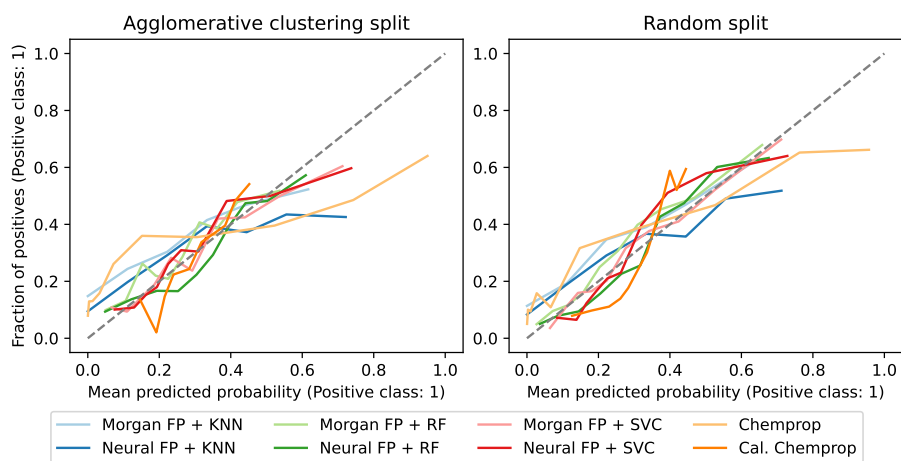

Fig. S37. Calibration curves for endpoint BSK\_hDFCGF\_CollagenIII\_down.

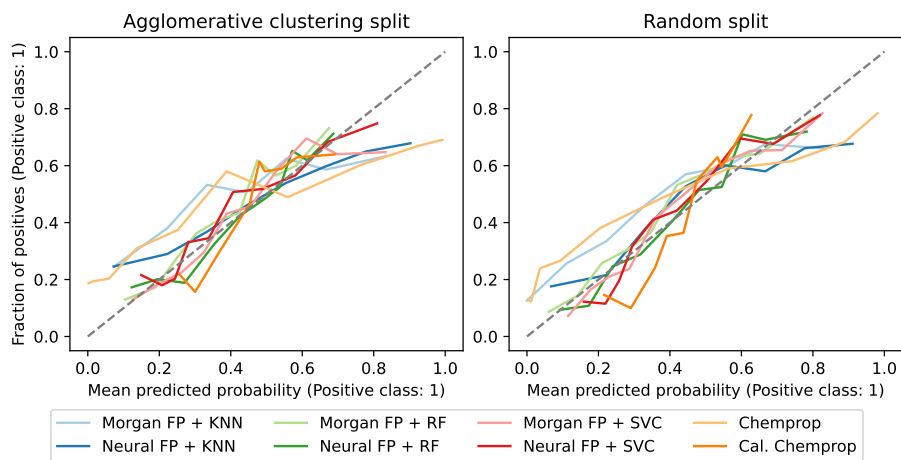

Fig. S38. Calibration curves for endpoint BSK\_hDFCGF\_Proliferation\_down.

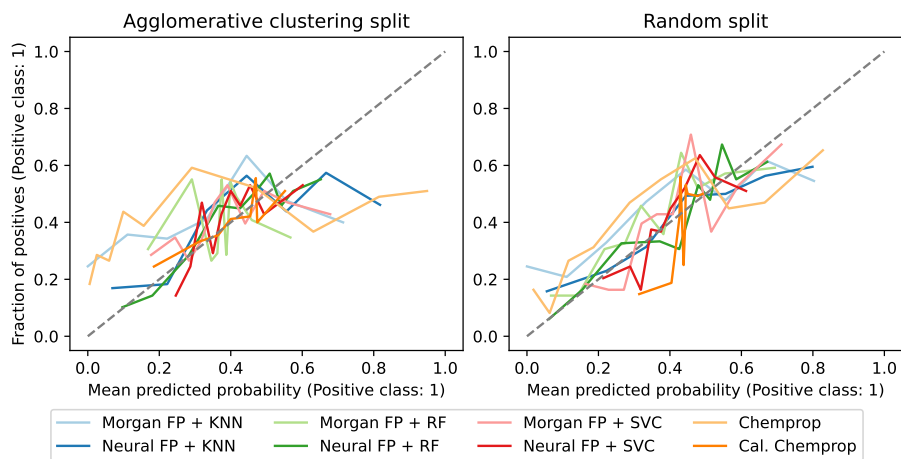

Fig. S39. Calibration curves for endpoint CEETOX\_H295R\_11DCORT\_dn.

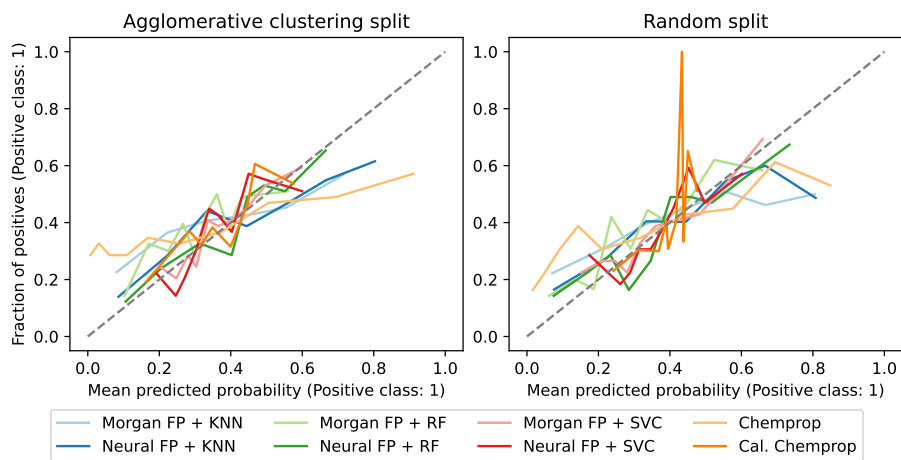

Fig. S40. Calibration curves for endpoint CEETOX\_H295R\_ANDR\_dn.

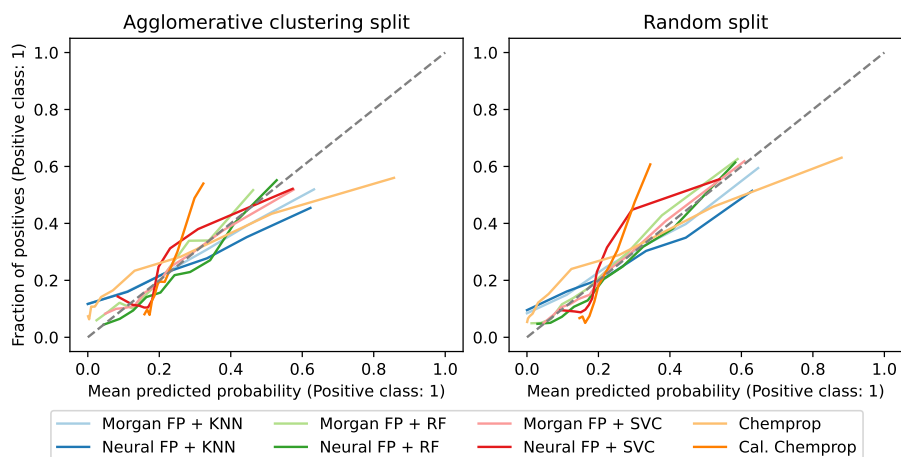

Fig. S41. Calibration curves for endpoint TOX21\_ARE\_BLA\_agonist\_ratio.

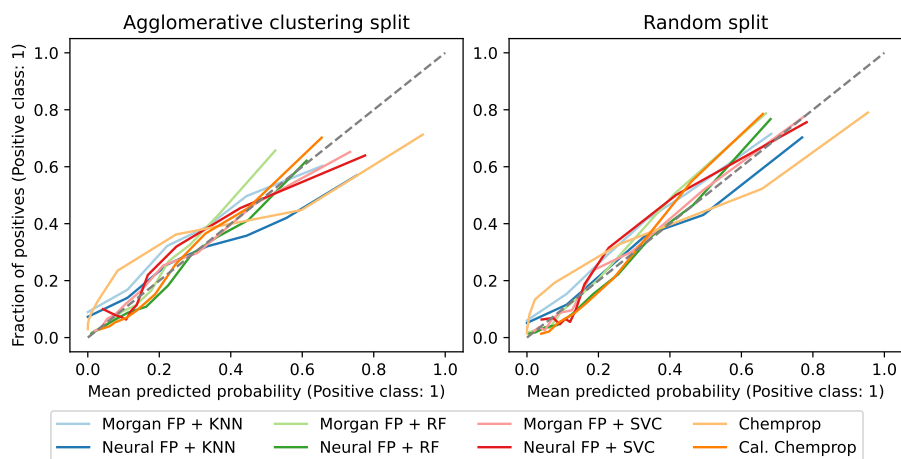

Fig. S42. Calibration curves for endpoint TOX21\_TR\_LUC\_GH3\_Antagonist.
